# 1           **Three-dimensional Multi-site Random Access Photostimulation (3D-MAP)**

2                           Yi Xue<sup>1</sup>, Laura Waller<sup>1</sup>, Hillel Adesnik<sup>2,\*</sup>, and Nicolas Pégard<sup>3,4,5,‡</sup>

3           <sup>1</sup>*Department of Electrical Engineering & Computer Sciences, University of California, Berkeley, CA, USA*

4                           <sup>2</sup>*Department of Molecular & Cell Biology, University of California, Berkeley, CA, USA*

5                           <sup>3</sup>*Department of Applied Physical Sciences, University of North Carolina at Chapel Hill, NC, USA*

6                           <sup>4</sup>*Department of Biomedical Engineering, University of North Carolina at Chapel Hill, NC, USA*

7                           <sup>5</sup>*UNC Neuroscience Center, University of North Carolina at Chapel Hill, NC, USA*

8                           Corresponding authors: \*[hadesnik@berkeley.edu](mailto:hadesnik@berkeley.edu), ‡[pegard@unc.edu](mailto:pegard@unc.edu)

## 9           **Abstract**

10   Optical control of neural ensemble activity is crucial for understanding brain function and  
11   disease, yet no technology can achieve optogenetic control of very large numbers of  
12   neurons at extremely fast rate over a large volume. State-of-the-art multiphoton  
13   holographic optogenetics requires high power illumination that only addresses relatively  
14   small populations of neurons in parallel. Conversely, one-photon holographic techniques  
15   can stimulate more neurons with 2-3 orders lower power, but with a trade-off between  
16   resolution and addressable volume. Perhaps most problematically, two-photon  
17   holographic optogenetic systems are extremely expensive and sophisticated which has  
18   precluded their broader adoption in the neuroscience community. To address this  
19   technical gap, we introduce a new one-photon light sculpting technique, Three-  
20   Dimensional Multi-site random Access Photostimulation (3D-MAP), that overcomes these  
21   limitations by modulating light dynamically, both in the spatial and in the angular domain  
22   at multi-kHz rates. We use 3D-MAP to interrogate neural circuits in 3D and demonstrate  
23   simultaneous photostimulation and imaging of dozens of user-selected neurons in the  
24   intact mouse brain *in vivo* with high spatiotemporal resolution. 3D-MAP could be broadly  
25   adopted for high-throughput all-optical interrogation of brain circuits owing to its powerful  
26   combination of scale, speed, simplicity, and cost.

## 27 **Introduction**

28 Optogenetics enables rapid and reversible control of neural activity<sup>1,2</sup>. By focusing light  
29 on neurons<sup>3</sup> with either one-photon<sup>4-12</sup> or two-photon photostimulation<sup>13-24</sup>, one can elicit  
30 or suppress the activity of custom neural ensembles in order to map neural circuits<sup>8,9,14-</sup>  
31 <sup>16</sup> and draw links between specific patterns of neural activity and behavior<sup>6,7,10,13,20-22</sup>.  
32 Two-photon photostimulation has the advantages of high spatial resolution for precise  
33 neural activity control and relative immunity to tissue light scattering, enabling precise  
34 stimulation of deep brain circuits. However, two-photon holographic optogenetic  
35 photostimulation can only stimulate relatively small ensembles of neurons at a time,  
36 limited by the very high-power pulsed illumination required to achieve non-linear  
37 multiphoton absorption. High photon density heats brain tissue, and can disturb brain  
38 activity and cause thermal damage<sup>24,25</sup>. The accessible volume for holographic two-  
39 photon photostimulation is also limited by the coherence length of laser being used, since  
40 holographic diffraction of femtosecond pulses to a large angle introduces severe pulse  
41 dispersion ('chirp'), substantially reducing pulse peak power<sup>26</sup>. Mechanically scanning a  
42 single focus or a holographic pattern can access a larger volume, but at the expense of  
43 simultaneous illumination<sup>27</sup> which is important to understand the network. But perhaps the  
44 primary barrier for their broader adoption is that multiphoton optogenetic systems are  
45 extremely expensive and sophisticated to operate and to maintain and thus, despite more  
46 than a decade since their introduction, have only been adopted by a small handful of  
47 groups, typically with much prior optical expertise.

48

49 In contrast, one-photon photostimulation systems require two to three orders-of-  
50 magnitude less laser power to activate neurons. They are much simpler to implement with  
51 far less expensive hardware, and they can still achieve high resolution photostimulation  
52 under limited light scattering conditions. There are three main strategies to generate  
53 multiple foci with one-photon photostimulation, yet none is capable of simultaneously  
54 stimulating specific multiple neural ensembles over a large 3D volume with high spatial  
55 resolution. The first approach, scanning-based one-photon photostimulation, stimulates  
56 neurons sequentially by rapidly scanning a single focus across small neural clusters with  
57 scanning mirrors<sup>28</sup> or acousto-optic deflectors (AODs)<sup>29,30</sup>. This method cannot photo-  
58 stimulate distributed ensembles simultaneously. The second approach is to directly  
59 project 2D illumination patterns onto samples with a Digital Micromirror Device (DMD)<sup>8-12</sup>.  
60 This widefield illumination scheme has a large field-of-view (FOV) and moderate lateral  
61 resolution but only modulates light in 2D. The axial resolution is poor and yields unwanted  
62 photostimulation above and below the focal plane. The third approach, Computer  
63 Generated Holography (CGH), generates 3D distributed foci by phase modulation of  
64 coherent light in Fourier space using a spatial light modulator (SLM)<sup>4-7</sup>. One-photon CGH  
65 has high lateral resolution and moderate axial resolution but has several critical  
66 drawbacks that constrain its ability to execute sophisticated optogenetics experiments.  
67 First, the throughput of CGH that determines the number of accessible voxels is  
68 fundamentally limited by the number of degrees-of-freedom (DoF), which is determined  
69 by the number of pixels and the bit depth of the SLM, regardless of magnification and  
70 numerical aperture. This generally results in a relatively small FOV at high spatial  
71 resolution. Second, the refresh rate (tens to hundreds Hz) of SLMs limits the speed of

72 CGH. Third, CGH requires computing a 2D phase mask at the Fourier plane for a 3D  
73 hologram pattern, which is an ill-posed problem that requires iterative optimization, with  
74 computation time on the order of minutes<sup>31-34</sup> when shaping light across multiple z-planes.  
75 Although recent work successfully reduces the CGH computation time to milliseconds  
76 using a pre-trained deep neural network<sup>35</sup>, the computation time could be very long when  
77 the neural networks become larger as the number of z-planes increases. The extra  
78 computational requirements for generating holographic patterns in the Fourier domain  
79 (rather than directly projecting patterns on the conjugate image plane) can become  
80 limiting when thousands of different patterns are required (as in high throughput mapping  
81 experiments), or when fast online synthesis of custom patterns is needed for closed-loop  
82 experiments. The fourth drawback of one-photon CGH is that holograms composed of  
83 many illumination spots will suffer spatial cross-talk as out-of-focus light from each  
84 focused spot interacts, accidentally stimulating non-targeted neurons. Taken together,  
85 despite the power of these previous one-photon techniques, none are suitable for large-  
86 scale high resolution optogenetic activation of 3D distributed ensembles of neurons.

87

88 To overcome this challenge, we developed 3D multi-site random access photostimulation  
89 (3D-MAP), a new approach to generate 3D illumination patterns by modulating light both  
90 in the angular domain,  $(k_x, k_y)$ , with scanning mirrors and in the spatial domain,  $(x, y)$ ,  
91 with a DMD. For 3D optogenetic photostimulation, illumination patterns must be optimized  
92 to target an opsin expressed neuronal soma ( $\sim 10\mu\text{m}$ ). The set of light rays needed to  
93 generate each spherical target can be described with a 4D light field,  $(x, y, k_x, k_y)$ , in the  
94 spatio-angular domain. 3D-MAP generates these rays by rapidly sweeping through the

95 appropriate angles of illumination with scanning mirrors while projecting the  
96 corresponding amplitude masks with the DMD to pattern each angle's spatial information.  
97 3D-MAP uses one spatial pattern on the DMD for each unique illumination angle set by  
98 the scanning mirrors. The total number of DoF is hence determined by the *product* of the  
99 number of angles of the scanning mirror and the pixels of the DMD (as opposed to the  
100 sum), resulting in a much larger DoF than existing one-photon optogenetic stimulation  
101 techniques<sup>4-12</sup>. Thus, 3D-MAP achieves both high spatial resolution and a large  
102 accessible volume. Compared to one-photon CGH, 3D-MAP is able to reduce spatial  
103 cross-talk by prioritizing illumination angles that minimize the stimulation of non-targeted  
104 areas due to its high DoF. Compared to 2D widefield patterning methods, 3D-MAP retains  
105 the advantages of high throughput and computational efficiency, while extending the  
106 addressable space from 2D to 3D. Thanks to the use of a DMD instead of a SLM, we can  
107 pattern the entire addressable volume at multi-kHz rate (the volumetric pattern refresh  
108 rate), which exceeds the bandwidth of most neural circuits and is one order-of-magnitude  
109 faster than 3D CGH. For reference, a comparison between strengths and weaknesses of  
110 3D-MAP versus existing photostimulation approaches is shown in Supplementary Table  
111 1.

112  
113 We present the experimental setup and computational methods for all-optical  
114 interrogation of neural circuits in 3D, and we demonstrate that 3D-MAP achieves high  
115 resolution, high speed, and high throughput in brain slices and *in vivo* recorded by  
116 electrophysiology and optical detectors, respectively. We then use 3D-MAP to interrogate  
117 neural circuits with both single-spot photostimulation and multi-spot photostimulation in

118 3D. These experiments validate 3D-MAP as a one-photon technique to manipulate neural  
119 circuits on-demand with high spatiotemporal resolution in the intact brain. Our technique  
120 can be flexibly used to map neural connectivity at both small and large scales. Its relative  
121 simplicity, small hardware footprint, and lower cost should make it broadly adoptable  
122 across the neuroscience community, and thus facilitate all-optical interrogation of neural  
123 circuits and behavior in the future.

124

## 125 **Results**

### 126 ***Optical Design of 3D-MAP***

127 The experimental setup for 3D-MAP is shown in Figure 1. A DMD modulates amplitude  
128 in real space,  $(x, y)$ , while scanning mirrors control the angles of illumination,  $(k_x, k_y)$ .  
129 Both devices are placed at conjugate image planes (Figure 1A) and time-synchronized  
130 (see Materials and Methods for details). We first compute the desired intensity of the light  
131 field  $(x, y, k_x, k_y)$ , and then sequentially display the amplitude mask pattern on the DMD  
132 as the scanning mirrors sweep through the relevant angles (Figure 1B). For example, in  
133 the simplest case of patterning a single focus spot at the native focal plane ( $z=0$ ), we  
134 simply turn on the pixels corresponding to the desired position, keeping the pattern  
135 constant for all illumination angles. To create a focused spot at an off-focus plane, a small  
136 aperture on the DMD rotates in a circle as the scanning mirrors sweep through a cone of  
137 projection angles (Figure 1B). The center of the aperture's revolving circle is the lateral  
138 position of the target spot, and the circle's diameter,  $D$ , determines the spot's axial  
139 position (a larger diameter concentrates light further away from the native image plane at  
140 an given illumination angle). To activate multiple neurons simultaneously, we simply  
141 superimpose the patterns corresponding to each target (Figure 1D). In addition, we can

142 adjust the laser power in each focused spot flexibly and individually by adjusting the  
143 aperture size on the DMD, the number of apertures aimed at a given target, and by  
144 adjusting the laser power if needed. The amount of light on any given target is  
145 quadratically proportional to the radius of the aperture. For example, changing the  
146 aperture radius from 10 pixels to 14 pixels will increase the stimulation power on the target  
147 by a factor 2 times.

148

149 Another way to describe the pattern design is that the amplitude masks are computed by  
150 tracing the perspective views of the target back to the objective's native focal plane along  
151 parallel ray directions set by the scanning mirrors. Hence, even complicated 3D target  
152 designs can be computed quickly and easily. In contrast, conventional CGH systems  
153 synthesize a 3D hologram by modulating a coherent laser beam with a 2D static phase  
154 mask at the conjugate Fourier plane, which is an ill-posed problem where the 3D pattern  
155 is an approximate solution. CGH uses coherent light that introduces speckle in the  
156 hologram pattern (Figure 1C, Figure 1—figure supplement 1A-D), and out-of-focus light  
157 above and below each targeted area generates cross-talk that unintentional activates  
158 non-targeted neurons. Conversely, 3D-MAP modulates light incoherently in time which  
159 eliminates speckle. The cross-talk can be reduced simply by not selecting certain  
160 illumination angles to avoid stimulating non-targeted areas, further enhancing the  
161 stimulation accuracy and efficiency (Figure 1C). More strategies to reduce cross-talk are  
162 discussed in the Discussion section.

163

164 The axial resolution of 3D-MAP depends on the number of beams (and their angles) that  
165 are sequentially projected to generate the targeted 3D intensity pattern (Figure 1E-F).  
166 Because the fastest frame refresh rate of the DMD (13kHz, or 77 $\mu$ s per frame) is about  
167 52-fold shorter than the stimulation time (4ms, see later sections for details), we can use  
168 up to 52 angles without sacrificing speed. However, the DMD has limited on-chip memory,  
169 so we choose to minimize the number of amplitude masks required. In all our  
170 experiments, we use 10 illumination angles for each 3D target; additional illumination  
171 angles only introduce minor improvements of the axial resolution (Figure 1E-F). The  
172 maximum refresh rate of the DMD is 13kHz, and each 3D volumetric pattern is generated  
173 by 10 masks on the DMD, so the maximum volumetric pattern rate is 1.3kHz, which is  
174 more than an order-of-magnitude faster than conventional CGH with commercial SLMs.  
175 Since the characteristic response time of the microbial opsin is much longer than the  
176 duration of individual projection masks, the relevant light sculpting pattern seen by the  
177 opsin is the time-averaged sum of the intensity of several mutually incoherent masks. In  
178 addition, the DMD masks for 3D-MAP are based on ray tracing and can be calculated  
179 much faster than phase holograms in CGH<sup>31-34</sup>, enabling real-time applications such as  
180 mapping neural circuits (see below).



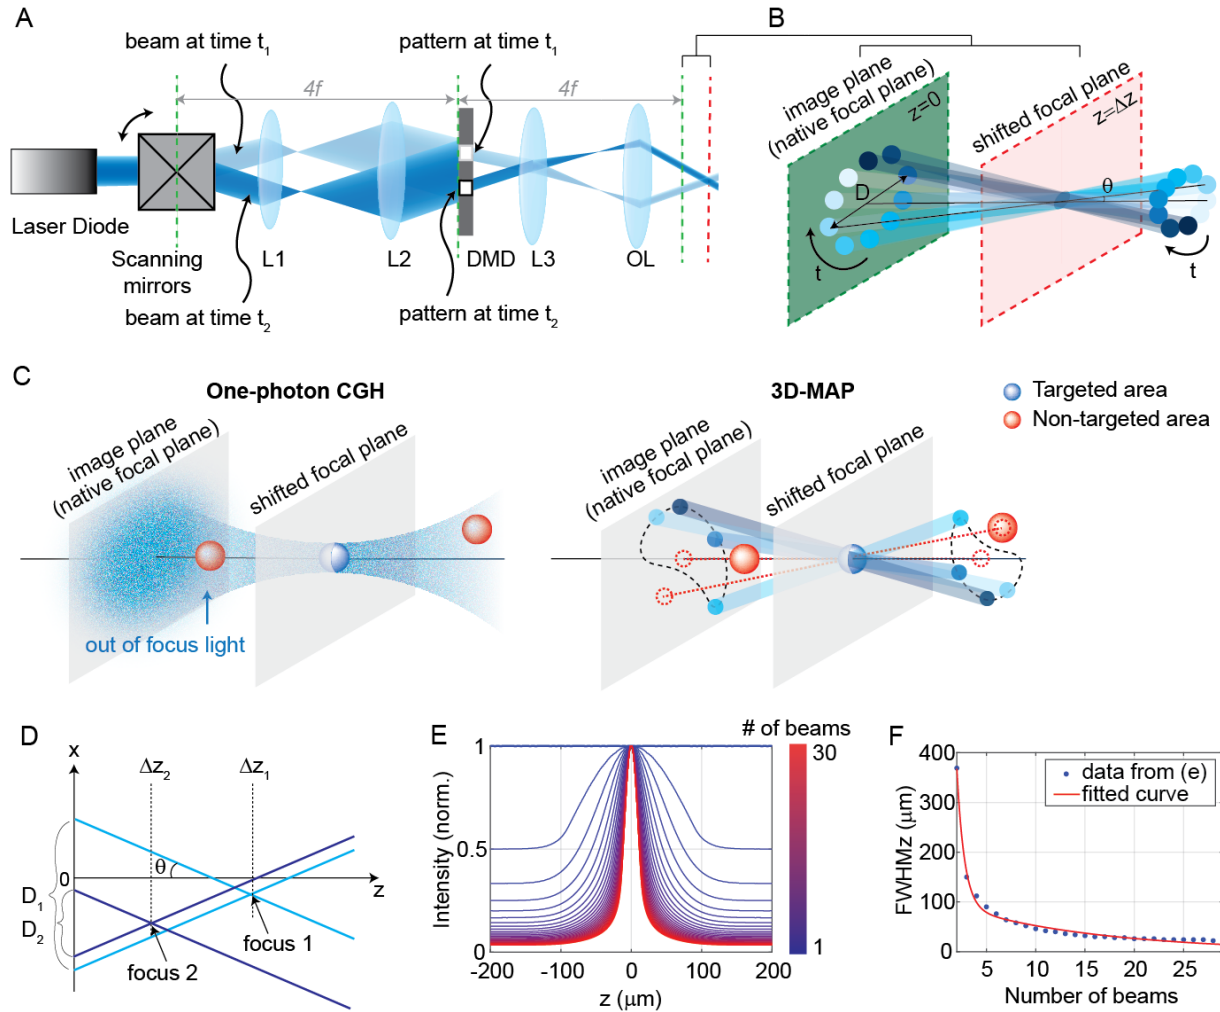

181  
182  
183  
184  
185  
186  
187  
188  
189  
190  
191  
192  
193  
194  
195  
196  
197  
198  
199  
200

**Figure 1. Experimental setup for Three-dimensional random Access Photostimulation (3D-MAP).** (A) A collimated laser beam illuminates the surface of a DMD with a custom illumination angle set by scanning mirrors. The DMD is synchronized with the scanning mirrors to match the 2D mask of the spatial aperture to the illumination angle. (B) Detailed view of the overlapping amplitude masks and illumination angles at the conjugate image plane (green) showing how synchronized illumination angles and amplitude masks can generate a focused spot away from the native focal plane (red). Circular patterns labeled by different colors are spatial apertures projected at different times. The position illuminated by all beams while sweeping through each illumination angle forms a focus at the shifted focal plane at  $z=\Delta z$ .  $D$  is the diameter of the sweeping trace.  $\theta$  is the illumination angle. (C) A focus generated by CGH stimulates the targeted area (blue) in focus but also stimulates non-targeted areas (red) out of focus. 3D-MAP can stimulate only the targeted areas and avoid non-targeted areas by closing the amplitude apertures along propagation directions that project to non-targeted areas (dashed red line). (D) Multiple foci can be generated simultaneously at various depths by superposition of their perspective projection along each illumination angle. (E) Simulated maximum intensity profile along the  $z$ -axis for an increasing number of overlapping beams shows how axial resolution increases with the number of superimposed projection directions. (F) Full width at half maximums (FWHMs) of the illumination patterns in (E). The data for a single beam is excluded because it has no  $z$ -sectioning ability.

## 201 **Optical Characterization of 3D-MAP**

202 To quantify the optical resolution of 3D-MAP, we first measured the 3D optical point-  
203 spread-function (PSF). We turned on a one-pixel aperture on the DMD (acting as a point  
204 source) and scanned through angles by scanning mirrors to generate a focus, which is  
205 imaged by a sub-stage camera with a thin fluorescent film on a microscope slide at many  
206 depth planes (Figure 2A-C). The full-width-half-maximums (FWHMs) of the resulting 3D  
207 optical PSF indicate a spatial resolution of  $5 \times 5 \times 18 \mu\text{m}^3$  with a 473nm excitation  
208 wavelength. We also demonstrated the ability to simultaneously generate 25 foci at  
209 custom (x, y, z) locations in a  $744 \times 744 \times 400 \mu\text{m}^3$  volume (Figure 2D). Additional examples  
210 of simultaneous 3D multi-spot generation are shown in Figure 2—figure supplement 1A-  
211 B. The foci on the edge of the accessible volume are slightly larger than the foci in the  
212 center generated by the same size aperture (63% larger along the x-axis and 38% larger  
213 along the z-axis on average for foci that are  $300 \mu\text{m}$  away from the center, Figure 2—  
214 figure supplement 1C-J). Together, these data show that 3D-MAP achieves high spatial  
215 resolution for multi-site stimulation over a large volume.

216

217 We next quantified the effects of optical scattering in mouse brain tissue on focusing  
218 capabilities with 3D-MAP by measuring the size of a target after propagating through  
219 acute brain slices (brain slices that are kept vital *in vitro* for hours) of increasing thickness  
220 placed just above the thin fluorescent film (Figure 2E). We generated a focused target by  
221 turning on a 10-pixel radius aperture on the DMD ( $8 \mu\text{m}$  in diameter at the native focal  
222 plane) to produce an illumination volume matching the typical dimensions of a neuronal  
223 soma in the cortex. We note that this target size is larger than the spatial resolution limit

224 of 3D-MAP, but that it represents a practical choice of 3D pattern that matches the size  
 225 of neurons and our application. We compared scattering for both blue (473nm) and red  
 226 (635nm) excitation wavelengths. Without the brain slice, the size of the focus was  
 227  $11.7 \times 11.7 \times 42 \mu\text{m}^3$  (473nm blue) and  $10.4 \times 10.4 \times 50.7 \mu\text{m}^3$  (635nm red). When generating  
 228 the focus through 50 $\mu\text{m}$ , 100 $\mu\text{m}$  and 150 $\mu\text{m}$  thick brain slices, the size of the focus spot  
 229 with blue light increased by 8%, 75%, and 269%, and the size of the focus spot with red  
 230 light increased by 67%, 107%, and 114%, respectively (averaged values measured along  
 231 the x-axis and the z-axis). Compared to other one-photon photostimulation techniques<sup>6,12</sup>,  
 232 3D-MAP achieves high optical resolution especially when the scattering is weak (in brain  
 233 slices or in superficial layers *in vivo*), and the resolution can be improved in the future by  
 234 using red stimulation light combined with red-shifted opsins such as Chrimson or  
 235 ChRmine (see Discussion).

236

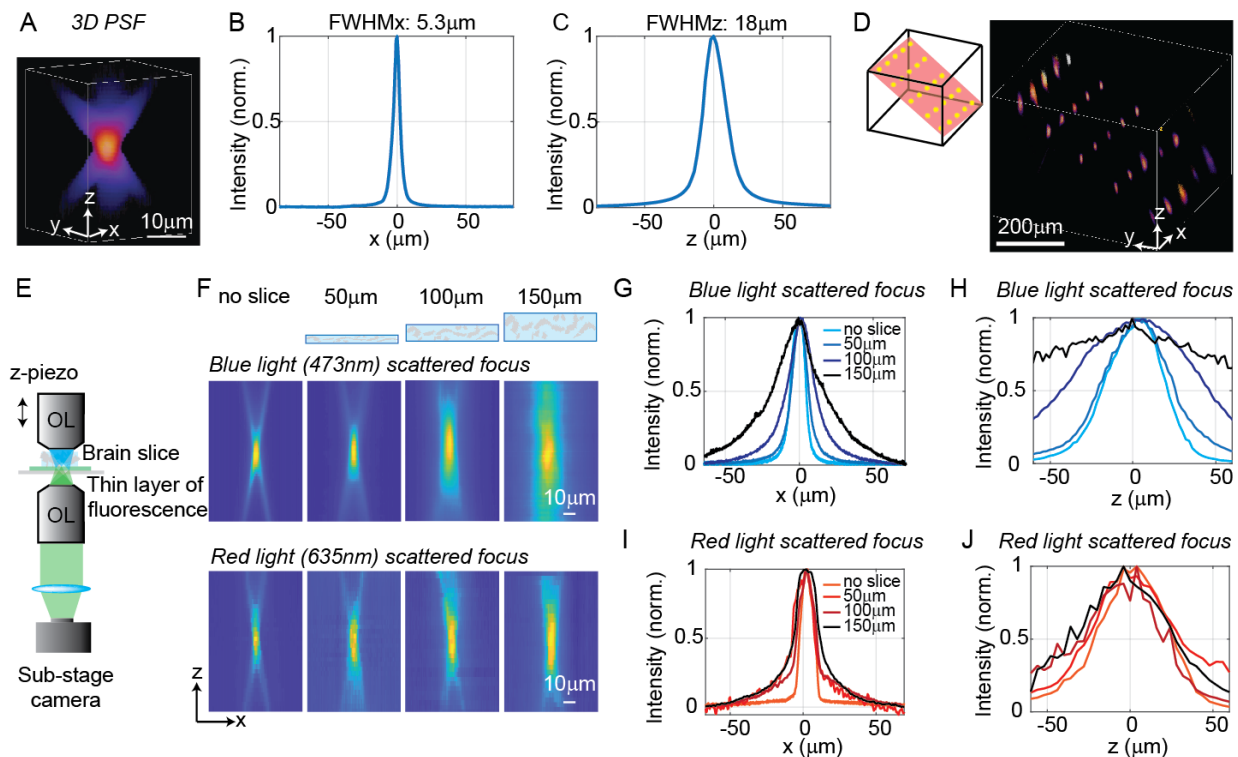

237

238 **Figure 2. Optical characterization of the spatial resolution of 3D-MAP under increasing optical**  
239 **scattering conditions.** (A) Experimentally measured 3D optical PSF (1-pixel aperture on DMD) built from  
240 focus-stacked 2D images of a thin, uniform fluorescent calibration slide recorded at different depths using  
241 a sub-stage camera. (B) The PSF's lateral cross-section (x-axis) has a FWHM of 5.3 $\mu\text{m}$ . (C) The PSF axial  
242 cross-section (z-axis) has a FWHM of 18 $\mu\text{m}$ . (D) Left: we simultaneously generated 25 foci spanning across  
243 a 744x744x400 $\mu\text{m}^3$  volume. Right, experimental measurement of the corresponding 3D fluorescence  
244 distribution. (E) Schematic diagram of the sub-stage microscope assembly for 3D pattern measurement.  
245 (F) XZ cross-section of the PSF, measured with blue (473nm) and red (635nm) light stimulation without  
246 scattering, and through brain tissue slices of increasing thickness: 50 $\mu\text{m}$ , 100 $\mu\text{m}$ , and 150 $\mu\text{m}$ . (G) Under  
247 blue light illumination, the FWHM along the x-axis for increasing amounts of scattering is 11.7 $\mu\text{m}$ , 12.2 $\mu\text{m}$ ,  
248 19.7 $\mu\text{m}$ , and 29.0 $\mu\text{m}$ , and (H) the FWHM along the z-axis is respectively 42 $\mu\text{m}$ , 46 $\mu\text{m}$ , 76 $\mu\text{m}$  and 122 $\mu\text{m}$ .  
249 (I) With red light illumination, the FWHM along the x-axis for increased amounts of scattering is 10.4 $\mu\text{m}$ ,  
250 19.3 $\mu\text{m}$ , 26.7 $\mu\text{m}$ , and 29.6 $\mu\text{m}$ , and (J) the FWHM along the z-axis is respectively 50.7 $\mu\text{m}$ , 75.4 $\mu\text{m}$ , 79.7 $\mu\text{m}$ ,  
251 and 73.1 $\mu\text{m}$ .

252

253

### 254 **3D-MAP Photostimulation in brain tissue**

255 We next quantified the physiological spatial resolution as measured by the physiological  
256 point spread function (PPSF) of 3D-MAP by stimulating neurons in acute mouse brain  
257 slices and *in vivo*. We performed whole-cell patch clamp recordings from L2/3 excitatory  
258 neurons expressing a soma-targeted version of the potent optogenetic protein ChroME<sup>24</sup>  
259 (see Materials and Methods). The PPSF measures the photocurrent response as a  
260 function of the radial and axial displacements between the targeted focus and the patched  
261 cell<sup>19</sup>. The physiological spatial resolution is not only related to the optical PSF but also  
262 to the laser power needed to drive a neuron to spike<sup>36</sup>. Since patterns for 3D-MAP can  
263 be calculated significantly faster than with CGH<sup>31-34</sup>, we measured the volumetric PPSF  
264 by recording the photocurrent response from 2,541 targeted locations (a 11x11x21 pixels  
265 grid) in 2-5 minutes, limited only by opsin kinetics. We chose a 4ms stimulation time (also  
266 known as 'dwell time') in all experiments to ensure full activation of opsins (Figure 3—  
267 figure supplement 1), followed by 8ms to 40ms inter-stimulation time (time between two  
268 stimulation pulses in successive targets, depending on the opsin type) to avoid  
269 photocurrent accumulation and minimize short term plasticity of the synapses under study.

270 Note that this is a specific choice for our experiments rather than the speed limit of 3D-  
271 MAP. The PPSF measurements show that 3D-MAP provides high resolution  
272 photostimulation *in vitro* (lateral FWHM,  $29 \pm 0.8 \mu\text{m}$ ; axial FWHM,  $44 \pm 1.6 \mu\text{m}$ , 9 cells,  
273 Figure 3A-D). Under these conditions, we found that the spatial specificity of 3D-MAP is  
274 only approximately two-fold worse when compared to our previous results using  
275 multiphoton optogenetics in comparable conditions<sup>19,24</sup>. We note that the PPSF of  
276 photocurrents for 3D-MAP should degrade more steeply as a function of tissue depth  
277 compared to multiphoton optogenetics due to scatter (see details in Discussion).

278

279 To quantify the physiological resolution of 3D-MAP for supra-threshold neuronal  
280 activation, we also measured the spiking probability of neurons in acute brain slices and  
281 *in vivo* along the lateral and axial dimensions. We targeted opsin-expressing neurons in  
282 the upper  $100 \mu\text{m}$  of the brain for the *in vivo* PPSF measurements. While patching the  
283 neuron, we digitally displaced the target generated by 3D-MAP along the x-axis and z-  
284 axis and record the number of spikes. Experimental results show that 3D-MAP enables  
285 high spatial specificity under all these conditions (Figure 3E-G shows *in vitro* results (5  
286 cells), with lateral FWHM,  $16 \pm 2.4 \mu\text{m}$ ; and axial FWHM,  $44 \pm 8.9 \mu\text{m}$ . Figure 3H-J shows *in*  
287 *vivo* results (8 cells), with lateral FWHM,  $19 \pm 3.7 \mu\text{m}$ ; and axial FWHM,  $45 \pm 6.1 \mu\text{m}$ ).

288

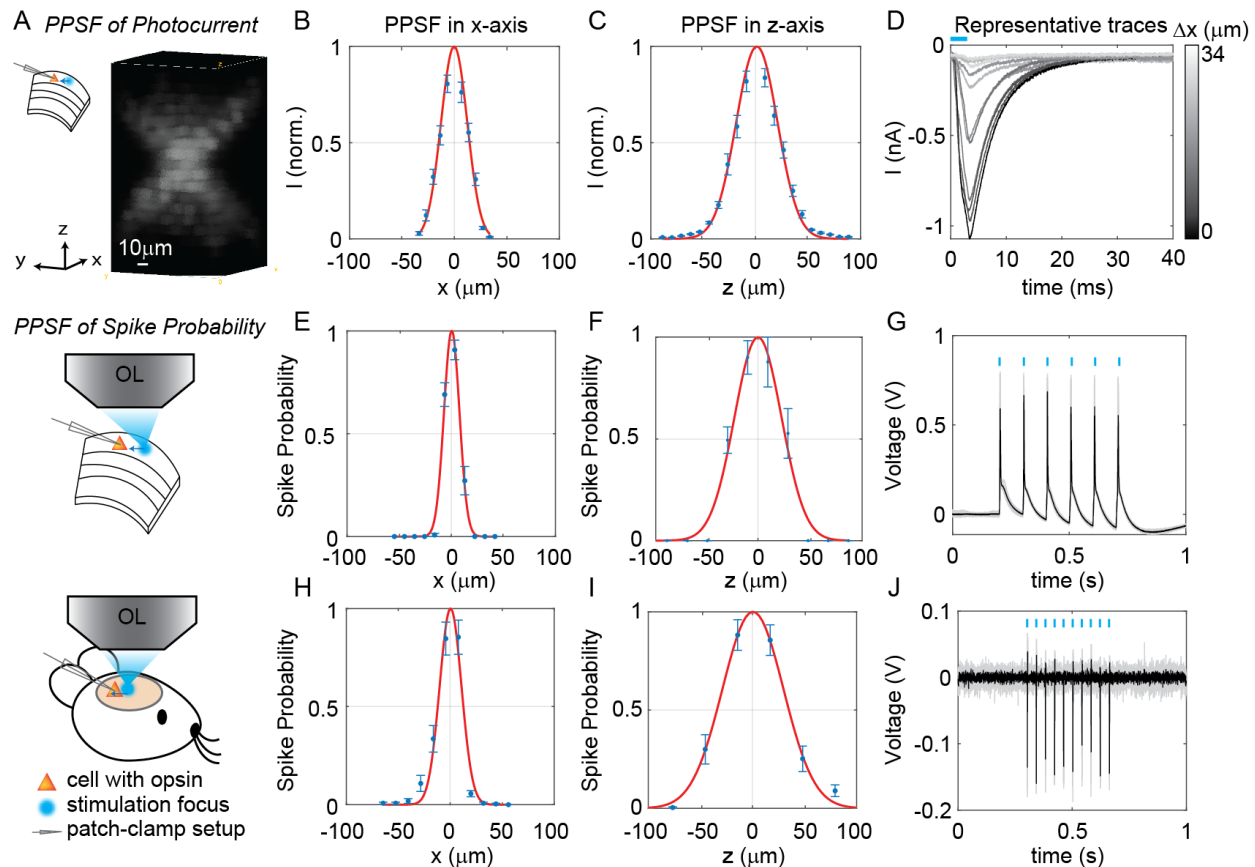

289

290 **Figure 3. 3D-MAP enables high spatial resolution photo-activation of neurons *in vitro* and *in vivo*.**

291 (A) Example 3D representation of a physiological point spread function (PPSF) photocurrent measurement

292 *in vitro*. (B, C) Photocurrent resolution (FWHM) is  $29 \pm 0.8 \mu\text{m}$  laterally, and  $44 \pm 1.6 \mu\text{m}$  axially ( $n=9$  neurons).

293 (D) Representative traces of direct photocurrent from 11 positions along the x-axis without averaging. (E,

294 F) 3D-MAP evoked spiking resolution in brain slices is  $16 \pm 2.4 \mu\text{m}$  laterally and  $44 \pm 8.9 \mu\text{m}$  axially ( $n=5$

295 neurons). (G) Representative traces of spike probability of 1 for *in vitro* measurements. (H, I) 3D-MAP

296 evoked spiking resolution measured *in vivo* is  $19 \pm 3.7 \mu\text{m}$  laterally and  $45 \pm 6.1 \mu\text{m}$  axially ( $n=8$  neurons). (J)

297 Representative traces of spike probability of 1 for *in vivo* measurements. The data shows the mean  $\pm$  s.e.m.

298 (standard error of the mean) for plots B-C, D-F, and H-I.

299

### 300 **Synaptic connectivity mapping over large volumes by a single focus**

301 In addition to high spatiotemporal resolution and fast computational speed, 3D-MAP

302 operates at low stimulation powers far below photodamage thresholds and is hence easily

303 scalable to address large neural ensembles in distributed volumes of brain tissue. To

304 demonstrate these advantages, we first used 3D-MAP to probe synaptic connectivity in

305 3D by randomly scanning a single focus (Figure 4). We expressed soma-targeted



306 ChroME in excitatory neurons of the cortex (see Materials and Methods) and performed  
307 whole-cell voltage clamp recordings from inhibitory interneurons that do not express  
308 ChroME under these conditions, to avoid the confounding effect of direct photocurrents  
309 in the patched neuron (Figure 4A). The wide-field fluorescent image (Figure 4B) shows  
310 the excitatory neurons (in red) and the patched inhibitory interneuron (in green). We first  
311 mapped an 800x800 $\mu\text{m}^2$  FOV at low spatial sampling (40 $\mu\text{m}$  grid) to identify the sub-  
312 regions that contained most of the presynaptic neurons (Figure 4C). We then re-mapped  
313 these sub-regions at fine resolution (20 $\mu\text{m}$ /pixel, Figure 4D) and again at even higher  
314 resolution (9 $\mu\text{m}$ /pixel, Figure 4E). Due to variable opsin protein expression levels across  
315 neurons, as well as variable intrinsic neural excitability, neurons are differentially sensitive  
316 to light. By mapping the same sub-region at different power levels, we were able to take  
317 advantage of this variability of photosensitivities to help identify putative individual (i.e.,  
318 'unitary') sources of presynaptic input (Figure 4D). We generated excitatory postsynaptic  
319 currents (EPSCs) by sequential photostimulation of the entire volume and observed that  
320 most connectivity maps exhibited spatial clusters (Figure 4D-E) as typically observed  
321 when mapping synaptic input in space<sup>14</sup>. Within each cluster, most of the postsynaptic  
322 responses had similar amplitudes and time courses, suggesting they primarily arose from  
323 just one or a small number of presynaptic neurons (Figure 4F-G). We also performed  
324 synaptic connectivity mapping *in vivo* (Figure 4—figure supplement 1). These results  
325 demonstrate that 3D-MAP is easily scalable and suitable for obtaining high-resolution and  
326 large-scale connectivity maps of neural circuits in 3D.

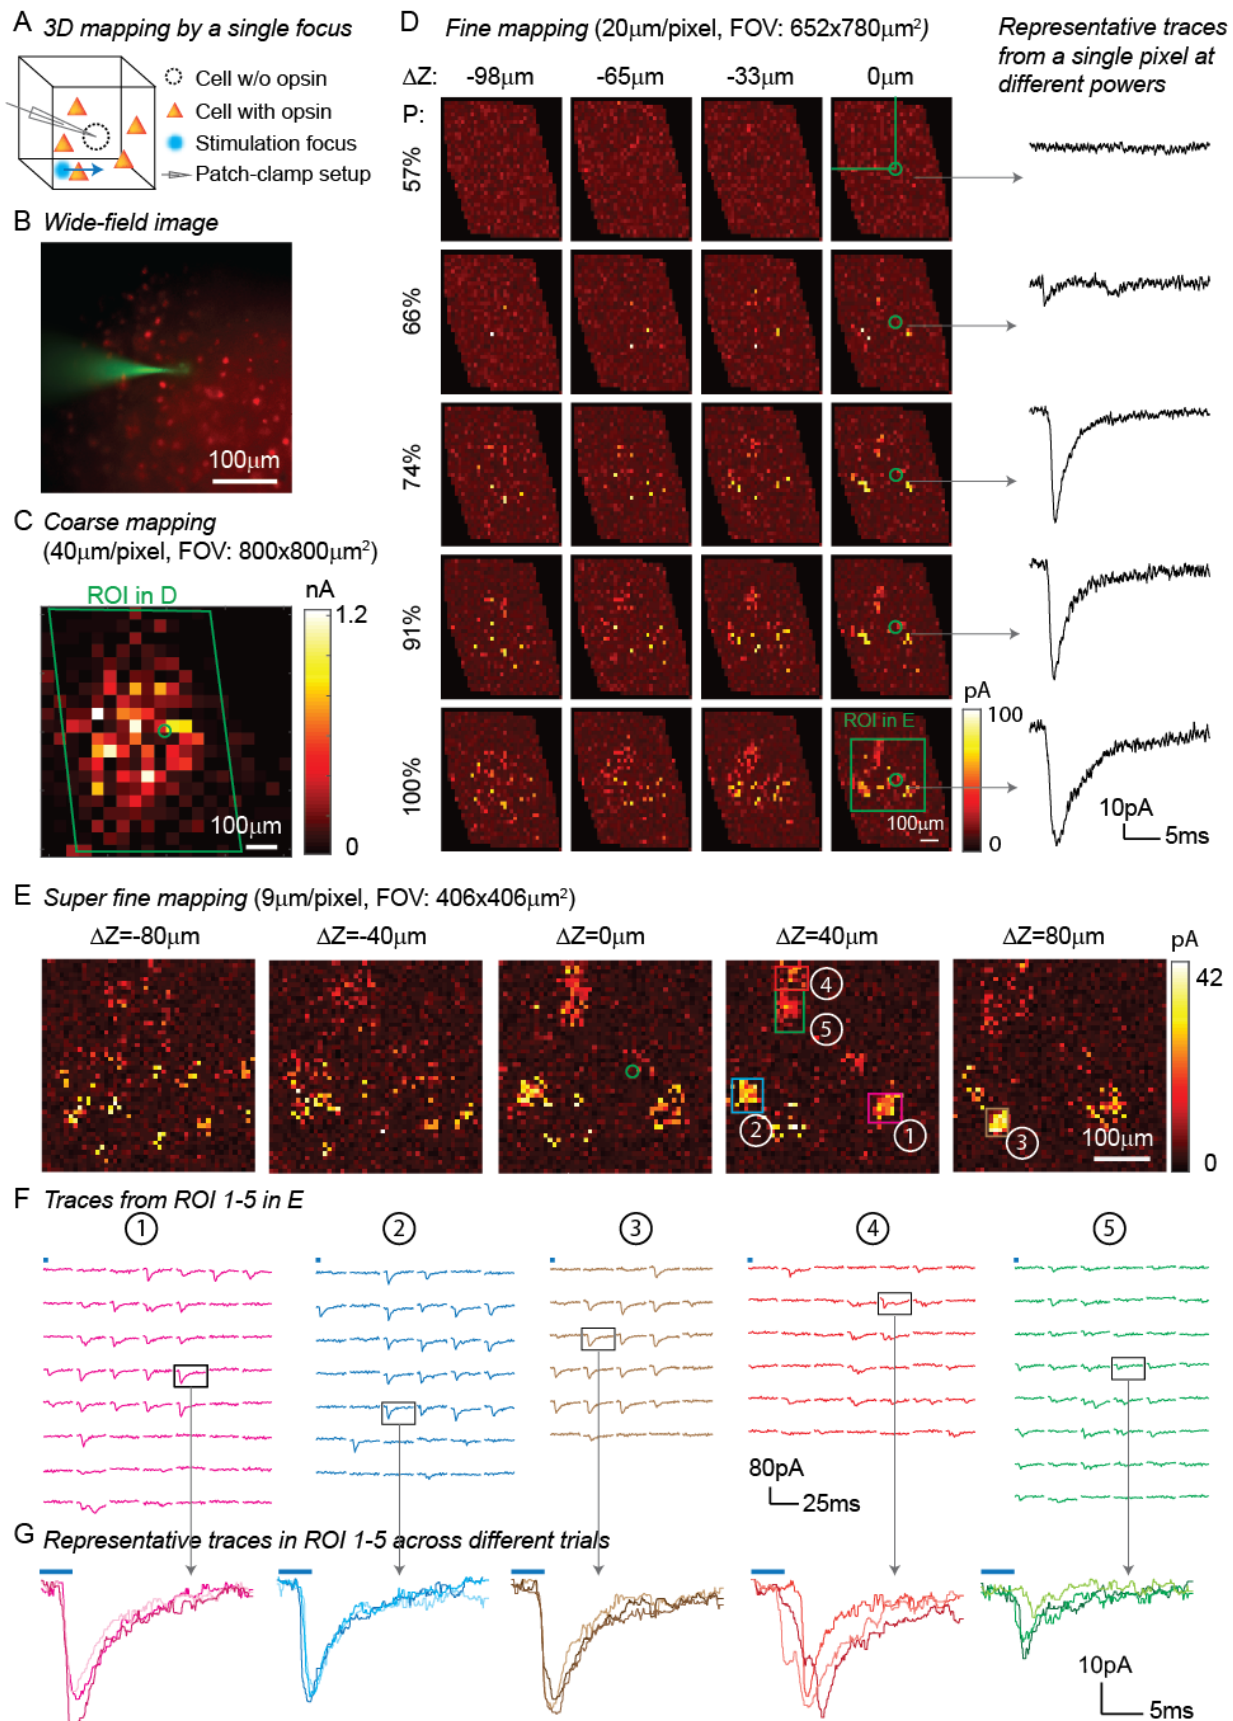



328 **Figure 4. 3D Mapping of excitatory synaptic connections with 3D-MAP.** (A) Schematic diagram  
329 of the experiment. A single focus randomly scans the volume adjacent to the patched interneuron that  
330 does not express opsin, and the readout map reveals the synaptic connections between photo-  
331 activated pyramidal neurons and the patched interneuron. (B) An example of widefield image of opsin-  
332 expressing pyramidal neurons (red) and the patched interneuron (green). (C) A coarse 2D map in an  
333  $800 \times 800 \mu\text{m}^2$  FOV at  $40 \mu\text{m}$  resolution identifies the sub-regions of the brain slice with presynaptic  
334 neurons. (D) Mapping the selected region at higher resolution (green box in C). Each row uses the  
335 same stimulation laser power (100% power:  $145 \mu\text{W}$ ) across multiple axial planes, and each column is  
336 a map of the same axial plane at different powers. Representative excitatory postsynaptic currents  
337 (EPSCs) traces (right) show how synaptic currents at the same photostimulation pixel change as the  
338 stimulation power increases, presumably due to recruitment of additional presynaptic neurons. Data  
339 are averaged over 5 repetitions. (E) Super-fine resolution mapping of the region of interest (ROI)  
340 (green box in D) in 3D at  $P=90 \mu\text{W}$ . The green circle in c-e labels the location of the patched interneuron.  
341 (F) Traces from ROIs 1-5 labeled in E, averaged over 5 repetitions. (G) Representative traces of single  
342 trials without averaging from corresponding ROIs in the same color, measured across three different  
343 repetitions. The blue bar on top of traces in F-G indicates the 4ms stimulation time.

344  
345 One of the major advantages of 3D-MAP over conventional single point scanning  
346 approaches<sup>28-30</sup> is that it has the capacity to simultaneously stimulate multiple neurons  
347 distributed anywhere in the addressable volume. Multi-site photostimulation is crucial for  
348 perturbing or mapping brain circuits because only the activation of neural populations in  
349 parallel can drive the sophisticated activity patterns needed to understand network  
350 dynamics or behavior<sup>36</sup>. Thus, we next demonstrated that 3D-MAP is able to  
351 simultaneously stimulate multiple user-defined targets (Figure 4—figure supplement 2)  
352 that we selected according to the connection map in Fig. 4e. While patching the same  
353 inhibitory interneuron as described above (Figure 4), we first stimulated the 5 presynaptic  
354 ROIs (Figure 4E-F) one-by-one, and then stimulated subsets of them simultaneously, and  
355 finally stimulated all the ROIs together (Figure 4—figure supplement 2C). We compared  
356 the photocurrents measured by multi-site simultaneous stimulation to the linear sum of  
357 individual responses by single stimulation (Figure 4—figure supplement 2D) and  
358 observed the multi-site stimulation generates greater net input (Figure 4—figure  
359 supplement 2E,  $p=0.0488$  for 2-5 sites stimulation, two-way analysis of variance

360 (ANOVA)). This example shows that 3D-MAP is able to simultaneously and flexibly  
361 stimulate multiple targets and also can rapidly adjust the 3D patterns in milliseconds,  
362 which is critical for online interrogation of neural circuits. Although 3D-MAP could readily  
363 co-stimulate many more targets at a time (see below), here we were limited by the number  
364 of presynaptically identified neurons.

365  
366 ***Reconstructing synaptic networks by multi-site stimulation via gradient descent***  
367

368 Physiological brain mapping approaches must overcome the challenge of temporal  
369 throughput to map ever larger regions of brain tissue. We reasoned that mapping neural  
370 circuits with multiple foci, rather than a single focus, could scale up the temporal  
371 throughput of the system dramatically, since the overall connectivity matrix is remarkably  
372 sparse. Instead of randomly shifting a single focus to measure the one-to-one synaptic  
373 connections (Figure 4), we used 3D-MAP to stimulate multiple random voxels  
374 simultaneously and reconstructed the spatial map of presynaptic networks via gradient  
375 descent. In our experiment, the positions of the simultaneously stimulated voxels were  
376 randomly distributed in the 3D volume and the neural connections are unknown to begin  
377 with, unlike co-stimulating known presynaptic ROIs in Figure 4—figure supplement 2. In  
378 acute brain slices we again patched a GABAergic interneuron under voltage-clamp mode  
379 and recorded both EPSCs, and subsequently, inhibitory postsynaptic currents (IPSCs).  
380 We projected random sets of foci (five at a time) and repeated this process until all voxels  
381 in 3D were stimulated several times (typically 5-10). Treating the recorded photocurrents  
382 as a combination of responses from multiple sites, we then reconstructed the map of the  
383 synaptic network using an optimization algorithm based on gradient descent (Figure 5A-  
384 B, see Materials and Methods).

385

386 Results in Figure 5C-E show the excitatory synaptic network map and inhibitory synaptic  
387 network map of the same GABAergic interneuron in an  $800 \times 800 \times 200 \mu\text{m}^3$  volume at three  
388 different stimulation powers. Multi-site simultaneous stimulation has two key advantages.  
389 First, multi-site stimulation engages the activity of spatially distributed ensembles of  
390 neurons (rather than single neurons or small local clusters), which may facilitate  
391 polysynaptic network activity and engages network level properties of the circuit. Second,  
392 since our approach is compatible with compressed sensing, it becomes possible to  
393 reconstruct the same mapping results with fewer measurements compared to single-  
394 target stimulation, assuming that the multiple stimulation sites are sparse, and that the  
395 readout signal is a linear combination of the inputs from these sites. The assumption is  
396 valid when the multiple voxels for concurrent stimulation are randomly drawn from the  
397 volume and the number of these voxels is much smaller than the total voxels in the volume  
398 (5 voxels are randomly drawn from 1600 voxels in our experiment). Since multiple voxels  
399 are stimulated at the same time (say  $N$  voxels), each voxel needs to be measured  $N$  times  
400 with different patterns to estimate the contribution of each voxel to the photocurrent if  
401 without compressive sensing. Under the assumption of sparsity and linearity, we can  
402 reconstruct the map of neural networks using compressive sensing and with less  
403 repetitions (Figure 5—figure supplement 1). This feature of 3D-MAP is critical to speed  
404 up the mapping of networks in large volumes where single-target stimulation of every  
405 voxel would be prohibitively time-consuming.

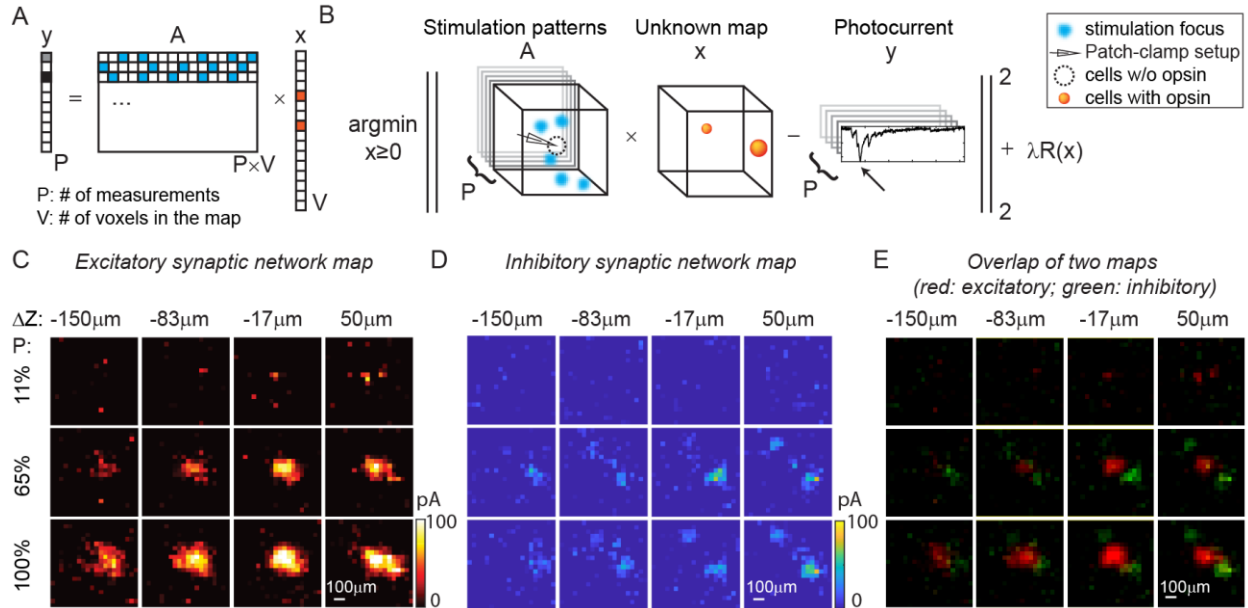

406  
 407 **Figure 5. Mapping of synaptic networks *in vitro* by multi-site random simultaneous stimulation**  
 408 **and computational reconstruction.** (A) The forward model for multi-site random simultaneous  
 409 stimulation.  $V$ , the number of voxels in the 3D volume.  $P$ , the number of patterns, which are orthogonal  
 410 to each other.  $y$ , peak value of the measured synaptic currents.  $A$  is a matrix, where each row  
 411 represents an illumination pattern, including 5 foci here (blue,  $N=5$ ).  $x$  is a vector of the unknown  
 412 synaptic networks to be reconstructed. (B) Inverse problem formulation. The optimal map,  $x$ , minimizes  
 413 the difference between the peak of measured currents ( $y$ ) and those expected via the forward model,  
 414 with a regularizer  $\lambda R(x)$ . (C) Excitatory synaptic connection map of a GABAergic interneuron located  
 415 at  $[0, 0, 0]$ . (D) Inhibitory synaptic connection map from the same cell. (E) Overlap of the excitatory  
 416 map (red) and inhibitory map (green) to show their spatial relationship. Figures in (C-E) are recorded  
 417 in an  $800 \times 800 \times 200 \mu\text{m}^3$  volume with three different stimulation powers (100% stimulation power is  
 418  $890 \mu\text{W}$  in total out of the objective lens). The number of simultaneous stimulation foci ( $N$ ) is five in  
 419 both cases and the results are average over five repetitions.

420  
 421

### 422 ***All-optical parallel interrogation of a large number of neurons in vivo***

423

424 All-optical interrogation of neural circuits permits the functional dissection of neuronal  
 425 dynamics *in vivo* and can causally relate specific patterns of neural activity to behavior.

426 So far, this has only been possible in the living mammalian brain with two-photon  
 427 holographic optogenetics<sup>13-16,20-22</sup>. Here, we tested whether we can use 3D-MAP for all-  
 428 optical interrogation of a large number of neurons *in vivo*, and use visible light but maintain  
 429 high spatial precision. To achieve this, we added an optical detection path to 3D-MAP for

430 fluorescence imaging (Figure 6A). First, we recorded a widefield image stack by  
431 mechanically scanning the objective to identify the location of labeled neurons in 3D. Then,  
432 we *simultaneously* photo-stimulated all the identified neurons in the volume with 3D-MAP  
433 (a pulse train of 10 pulses at 20Hz, and each pulse is 4ms consisting of 10 projection  
434 angles and masks), and recorded calcium activity at 10Hz of all these neurons by  
435 widefield imaging with ROI projection using the same DMD (Figure 6A insert plots). Since  
436 one-photon widefield imaging has no z-sectioning ability, we took advantage of this  
437 feature to capture fluorescence signals from neurons that are above and below the focal  
438 plane (dash plane in Figure 6A). To improve the image contrast as well as reduce photo-  
439 bleaching, we used 2D patterns computed from the maximum z projection of the widefield  
440 image stack to selectively illuminate only the neurons<sup>10</sup> rather than the whole field when  
441 recording calcium activity. We started imaging after stimulation of the opsin to avoid  
442 artifacts caused by the stimulation light exciting the calcium indicator (inset plot in Figure  
443 6A). The start time ( $t=0$ ) in all the z-scored images refers to the start time of imaging, not  
444 the start time of stimulation. We co-expressed the blue-light sensitive opsin soma-  
445 targeted stCoChR-p2A-H2B-GFP and the red calcium sensor jRCaMP1a sparsely<sup>37</sup> in  
446 L2/3 neurons in the mouse brain<sup>23</sup> via *in utero electroporation* (Figure 6C). We then  
447 implemented all-optical 3D-MAP to simultaneously stimulate and image, and selectively  
448 interrogate tens of neurons in the mouse brain.

449

450 We first performed a control experiment with acute brain slices to show that the observed  
451 changes in fluorescence intensity are indeed due to calcium activity (Figure 6B). We  
452 photo-stimulated and imaged 28 neurons simultaneously *in vitro* (see Figure 6—figure

453 supplement 1A for the widefield image of the neurons) and we recorded calcium activity  
454 from these neurons before and after applying tetrodotoxin (TTX) to block action potentials.  
455 Importantly, TTX completely blocked the light-induced calcium transients demonstrating  
456 that they are due to calcium influx following light-evoked spiking. The results show  
457 obvious changes of fluorescence intensity before applying TTX and no changes after  
458 applying TTX (Figure 6B). Therefore, the changes of fluorescence intensity are caused  
459 by calcium activity rather than system artifacts.

460

461 All subsequent experiments were then performed *in vivo* in L2/3 neurons that are 200 $\mu$ m-  
462 300 $\mu$ m deep (Figure 6—figure supplement 1B) in the intact mouse brain. We first  
463 performed a power test to determine the optimal photostimulation power needed to elicit  
464 detectable calcium activity in each neuron (Figure 6D). Then, we measured an *in vivo* all-  
465 optical 3D PPSF (a measure of calcium fluorescence change as a function of radial and  
466 axial displacements of the excitation target) with L2/3 neurons at the optimized power.  
467 The all-optical PPSF reflects the spatial specificity of all-optical 3D-MAP, incorporating  
468 the optical PSF, opsin sensitivity, and calcium indicator sensitivity, which is yet another  
469 system characterization that differs both from the optical PSF and from electrophysiology  
470 PPSF. Averaged measurements of all-optical PPSF across 10 neurons indicate a lateral  
471 resolution of  $49\pm 21\mu$ m and an axial resolution of  $53\pm 28\mu$ m (Figure 6E). An example of  
472 calcium traces from 11 positions along the x-axis in the all-optical PPSF measurement is  
473 shown in Figure 6—figure supplement 1C. The result demonstrates all-optical 3D-MAP  
474 achieves high spatial resolution *in vivo* under the conditions used.

475

476 Next, we tested whether 3D-MAP could photo-activate a large number of neurons *in vivo*  
477 in 3D while maintaining spatial specificity. We photo-stimulated and imaged 80 user-  
478 selected L2/3 neurons *in vivo* simultaneously with a total power of 480 $\mu$ W out of the  
479 objective lens (Figure 6F-G). Figure 6F shows the maximum z projection of a  
480 600x600x40 $\mu$ m<sup>3</sup> volume, and Figure 6G shows the calcium activity recorded  
481 simultaneously from every jRCaMP1-expressing neuron in the volume. The stimulation  
482 pattern is shown in Figure 6—figure supplement 1D and the average separation between  
483 neurons is about 49 $\pm$ 26 $\mu$ m (Figure 6—figure supplement 1E). The number of neurons  
484 stimulated was limited here by the size of FOV and the density of expressing neurons,  
485 and potentially could be over one hundred neurons with a larger FOV (see Discussion).  
486 These results demonstrate that all-optical 3D-MAP achieves high-throughput  
487 photostimulation and imaging of neurons.

488

489 Finally, we tested whether all-optical 3D-MAP can stimulate and image ensembles of  
490 spatially intermixed neurons as has been shown with two-photon holographic  
491 optogenetics<sup>13,21,24</sup>. The relatively sparse expression of the opsin and calcium sensor  
492 here facilitated targeting specificity (mean distance between neurons in the FOV was  
493 67 $\pm$ 37 $\mu$ m which was larger than the all-optical PPSF, Figure 6—figure supplement 1F).  
494 Instead of photo-stimulating all neurons in the volume simultaneously, we randomly  
495 assigned 32 neurons to 4 ensembles (8 neurons per ensemble) by Poisson disc sampling  
496 and we photo-stimulated each of the four ensembles sequentially while simultaneously  
497 imaging all neurons in the four ensembles with patterned illumination (Figure 6H-I). The  
498 widefield image of the neurons and the 4 stimulation patterns are shown in Figure 6—

499 figure supplement 1G-H. Figure 6H shows the calcium activity of all neurons under  
500 different photostimulation patterns, and Figure 6I shows the peak z-score of each neuron  
501 versus the stimulated neuron. We observe that neurons exhibit strong calcium activity  
502 primarily when they are stimulated, and minimal calcium activity when the adjacent  
503 neurons are stimulated. Another example with 30 neurons in 6 ensembles is shown in  
504 Figure 6—figure supplement 2. These results demonstrate minimal cross-talk between  
505 photo-stimulated ensembles and limited off-target stimulation within the imaging volume  
506 even when stimulating and imaging L2/3 neurons *in vivo*. Thus, under relatively sparse  
507 opsin-expression conditions, 3D-MAP can be used to photo-activate user-defined  
508 spatially intermixed ensembles in the superficial layers of the mouse brain. For densely  
509 labeled populations, 3D-MAP could still be used to photo-activate small spatial clusters  
510 of neurons which, depending on the goals of the experiments, could still be very  
511 informative<sup>8,10</sup>.



512

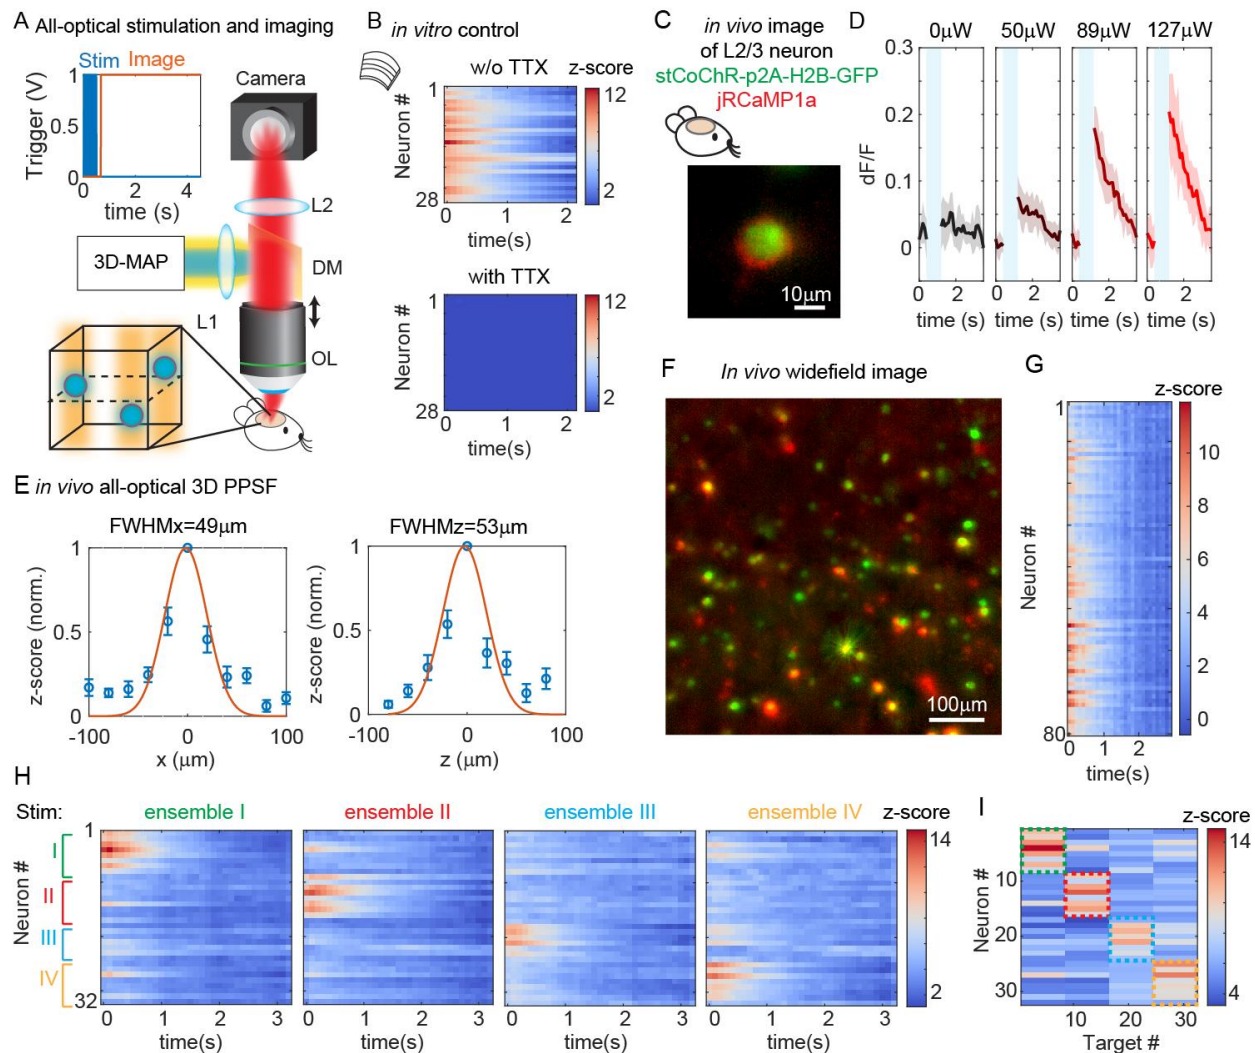

513

514

**Figure 6. All-optical simultaneous photostimulation and imaging of groups of neurons at L2/3**

515

**in the mouse brain.** (A) Experimental setup. The 3D-MAP setup as in Figure 1A is combined with an

516 imaging path using a dichroic mirror, relay lenses, and a camera. Zoom-in view: neurons (blue circles)

517 are stimulated in 3D with 3D-MAP, and calcium activity is recorded from widefield imaging with

518 selective fluorescence excitation (yellow light) by the DMD. The dashed plane indicates the imaging

519 focal plane. Top left: A timing plot shows that fluorescence imaging begins at  $t=0$ , immediately after

520 photostimulation. (B) Control experiment with brain slices. Top: calcium activity recorded from 28

521 neurons. Bottom: same neurons after applying TTX, when no calcium activity is detected. (C)

522 Fluorescent *in vivo* image of a L2/3 neuron that co-expresses stCoChR-p2A-H2B-GFP (green) and

523 jRCaMP1a (red). (D) Power test of a representative neuron, averaged across 10 repetitions. The blue

524 box indicates the period when stimulation laser is on, and the imaging acquisition is off. (E) *in vivo* all-

525 optical 3D PPSF. The lateral resolution is about  $49 \pm 21 \mu\text{m}$  and the axial resolution is about  $53 \pm 28 \mu\text{m}$

526 ( $n=10$  L2/3 neurons). (F) Maximum z projection of an *in vivo* widefield image stack ( $600 \times 600 \times 40 \mu\text{m}^3$ )

527 of L2/3 neurons, (green, stCoChR-p2A-H2B-GFP; red, jRCaMP1a). (G) Calcium activity of 80 neurons

528 as in f recorded during simultaneous photostimulation and imaging. (H) Calcium activity of 32 neurons

529 that are addressed with four distinct photostimulation patterns (labeled with different colors, also see

530 Figure 6—figure supplement 1H) while fluorescence imaging data is acquired. (I) Peak z-score of each

531 calcium trace recorded in H versus the corresponding stimulation patterns. The dashed colored  
532 rectangles highlight the neurons that are stimulated in each of the four patterns.

533

## 534 **Discussion**

535

536 In this study we demonstrated and validated 3D-MAP, a one-photon technique that

537 enables 3D multi-site random access illumination for high precision optogenetic

538 photostimulation and imaging. 3D-MAP combines novel computational and optical

539 advances to offer powerful and versatile optical brain manipulation capabilities. Unlike

540 prior one-photon approaches that have low spatial resolution (DMD-based 2D

541 projection)<sup>8-12</sup> or small FOV (SLM-based 3D CGH)<sup>4-7</sup>, 3D-MAP achieves high spatial

542 precision at high speeds and in large 3D volumes, successfully addressing the superficial

543 layers of neurons in the intact brain. 3D-MAP is the first system to achieve 3D multi-site

544 illumination with previously unattainable DoF by simultaneously sculpting the light field in

545 both intensity and angular domains. Therefore, 3D-MAP is able to generate high

546 resolution 3D patterns over large volumes that CGH cannot synthesize. 3D-MAP is also

547 able to project 3D patterns at much faster speeds than CGH, not only because the current

548 refresh rate of DMDs is an order of magnitude faster than that of SLMs, but also because

549 calculating the light field parameters with ray tracing in 3D-MAP is much faster than

550 calculating phase masks in 3D CGH. Perhaps most importantly for the broader

551 neuroscience community, one can build a 3D-MAP system a small fraction of the cost of

552 two-photon holographic optogenetic systems (see Supplement Table 2). At the expense

553 of lower spatial resolution and depth penetration, 3D-MAP is far simpler to operate and

554 maintain and can readily address just as many neurons with far lower laser power. Since

555 many types of circuit investigation experiments do not require the absolute spatial

556 specificity of two-photon approaches<sup>8,10</sup>, many groups that would not otherwise leverage

557 patterned illumination approaches could adopt 3D-MAP for their optogenetics research  
558 applications.

559

560 3D-MAP is the first demonstration that uses 4D light field patterning for *in vivo* optogenetic  
561 photostimulation. Even though two-photon photostimulation techniques have combined  
562 SLMs with scanning mirrors previously<sup>21,38,39</sup>, 3D-MAP is fundamentally different from  
563 these techniques because it modulates the 4D light field  $(x, y, k_x, k_y)$ , so the degrees-of-  
564 freedom (DoF) of the system is the *product* of the DMD's and the scanning mirrors' DoF.  
565 In previous work, the SLM and scanning mirrors both modulate 2D phase at the same  
566 plane  $(k_x, k_y)$ , so the DoF of the previous systems<sup>21,38,39</sup> is the *sum* of the SLM's and the  
567 scanning mirrors' DoF. Hence, 3D-MAP achieves orders-of-magnitude more DoF without  
568 extra hardware. A further advantage of 3D-MAP over previous work is that it synthesizes  
569 a custom 3D intensity pattern in 3D  $(x, y, z)$  with 4D light field control, which is a well-  
570 posed problem, whereas controlling 3D intensity with 2D phase control is an ill-posed  
571 problem. Note that previous work<sup>40</sup> on 4D light field display also used a DMD, along with  
572 a microlens array (MLA), but is fundamentally different from 3D-MAP. First, the DoF of  
573 3D-MAP is orders-of-magnitude higher since scanning mirrors have much more DoF than  
574 a fixed MLA. Second, the MLA has a built-in tradeoff between spatial and angular  
575 resolution whereas 3D-MAP does not. Therefore, the maximum defocus range of 3D-  
576 MAP is 720 $\mu$ m (Figure 2—figure supplement 1A) whereas the MLA-based method only  
577 achieves 40 $\mu$ m range in microscopy applications. Third, we demonstrated 3D-MAP with  
578 acute brain slices and *in vivo* mouse brain where tissue scattering distorts the light field

579 and limits the resolution, whereas the previous work is not used for optogenetics under  
580 scattering.

581

582 As a proof-of-principle experiment, we demonstrated all-optical 3D-MAP in a relatively  
583 thin 3D volume ( $600 \times 600 \times 40 \mu\text{m}^3$ ) where two opsin-expressing neurons right on top of  
584 each other along the z-axis is very rare under the conditions of relatively sparse labeling<sup>37</sup>.  
585 Also, because we used a patterned widefield imaging system to detect the fluorescence  
586 emitted from calcium indicators, the signal-to-noise ratio of the fluorescence images will  
587 be lower than the readout noise of the camera if the neuron is too far away from the focal  
588 plane. To enable 3D detection over a larger axial range, one could apply pupil encoding<sup>34</sup>,  
589 light-field detection<sup>41,42</sup>, or remote focusing<sup>43</sup> to the imaging path of 3D-MAP.

590

591 Both one-photon and two-photon multi-site photostimulation are subject to spatial cross-  
592 talk, as out-of-focus light from one target may accidentally stimulate neurons that are at  
593 other focal planes, especially when the density of foci is high or when out-of-focus  
594 neurons are more photosensitive than the desired targets. In Figure 6, we demonstrated  
595 that the cross-talk in our experiment is minimal under conditions of relatively sparse opsin  
596 expression as obtained with conventional *in utero* electroporation<sup>37</sup>. However, when the  
597 separation between two adjacent neurons is closer than the all-optical PPSF, off-target  
598 effects are likely, even under sparse expression conditions. Therefore, in addition to  
599 expression sparsity, we can also control the stimulation pattern's sparsity to mitigate  
600 spatial cross-talk. When the desired density of foci is high and cross-talk is expected, 3D-  
601 MAP could potentially leverage its multi-kHz patterning speed to exploit the temporal

602 domain by multiplexing patterns and targeting smaller subsets of neurons at a time in  
603 order to increase pattern sparsity.

604

605 The maximum number of neurons that can be co-stimulated without cross-talk in one-  
606 photon or two-photon photostimulation depends on the available laser power, the limits  
607 of brain heating, the spatial resolution of the system, the FOV, and the spacing of opsin-  
608 expressing neurons. Compared to two-photon photostimulation, 3D-MAP trades on  
609 spatial resolution (by a factor of 2-3 in superficial layers) to use 2-3 orders lower laser  
610 power. For example, two-photon photostimulation techniques typically restrict the  
611 instantaneous power under the objective below 4W to avoid photodamage<sup>16,24</sup>. At full  
612 power, two-photon photostimulation techniques can simultaneously activate tens to over  
613 a hundred neurons<sup>16,21,24,44</sup>. In contrast, 3D-MAP is able to photostimulate dozens of  
614 neurons simultaneously with only 480 $\mu$ W out of the objective (Figure 6F-G). 3D-MAP  
615 requires sparser expression than for two-photon stimulation to achieve comparable  
616 effective specificity, but since total needed power is nearly 100-fold less for comparable  
617 stimulation patterns, brain heating is much less of a concern, and the technique can be  
618 scaled up to address more neurons in a larger brain area. Many experiments do not need  
619 full optical control over all neurons in a volume – for example, when targeted a specific  
620 transcriptional subtype, and many other experiments do not absolutely require single-cell  
621 specificity. Thus, for many applications 3D-MAP should be preferable to two-photon  
622 applications, with the specific exceptions of experiments that demand photo-stimulation  
623 of precise ensembles within a small volume of densely labeled tissue, or when the neural  
624 targets are located at brain depths only accessible to infrared light. The simplicity and

625 scalability of 3D-MAP thus provides new experimental capabilities that two-photon  
626 photostimulation techniques cannot easily achieve.

627

628 Like any other one-photon photostimulation technique, the effective resolution of 3D-MAP  
629 in brain tissue is determined by scattering. As we show in Figure 2 and Figure 6,  
630 illumination with red shifted sources can reduce Rayleigh scattering and mitigate  
631 resolution loss through brain tissue, but the accessible depth remains fundamentally  
632 limited to the first few hundreds of microns below the surface of the mouse brain and the  
633 scattering effect is more severe the deeper the stimulation is. To photo-stimulate neurons  
634 deeper inside the mammalian brain with 3D-MAP, the cortex can be surgically  
635 removed<sup>10,45-46</sup> or implemented with a miniaturized microscope<sup>6,47</sup> as it is routinely  
636 performed to image deep structures such as the hippocampus or the thalamus. Taken  
637 together, 3D-MAP is a new volumetric optogenetic projection system that offers major  
638 advantages over existing one-photon and two-photon optogenetic technologies and  
639 should facilitate a wide range of neural perturbation experiments to map the structure and  
640 function of brain circuits.

641

## 642 **Materials and Methods**

643

644 **Ethical statement.** All animal experiments were performed in accordance with the  
645 guidelines and regulations of the Animal Care and Use Committee of the University of  
646 California, Berkeley.

647

648 **Data availability.** The datasets generated during and/or analyzed during the current  
649 study are available upon reasonable request to the corresponding authors.



650  
651 **Code availability.** Custom code used to collect and analyze data is programmed in  
652 MATLAB. The code has been deposited in Github ([https://github.com/Waller-Lab/3D-](https://github.com/Waller-Lab/3D-MAP)  
653 MAP).

654  
655 **3D-MAP optical setup.** The laser sources for optogenetic stimulation are Diode Pumped  
656 Solid State (DPSS) laser diodes. One is at 473nm wavelength (MBL-N-473A-1W,  
657 Ultralasers, Inc., Canada) and the other at 635nm wavelength (SDL-635-LM-5000T,  
658 Shanghai Dream Lasers Technology Co., Ltd., China) for different opsins. The results  
659 shown in Figure 5 and Figure 3—figure supplement 1E-H are measured under red  
660 stimulation, and all the others are stimulated by blue light. The laser source for *in vivo*  
661 PPSF (Figure 3H-J), the wide-field imaging (Figure 4B), and calcium imaging (Figure 6,  
662 Figure 6—figure supplement 1-2) is a DPSS laser at 589nm wavelength (MGL-W-589-  
663 1W, Ultralasers, Inc., Canada). Current supplies are externally driven by an analog  
664 modulation voltage. The laser beams are scanned by a pair of galvo-mirrors (GVS202,  
665 Thorlabs, Inc., U.S.), and then the beam size is expanded to fill the DMD (DLP9000X and  
666 the controller V4390, ViALUX, Germany) by a 4-f system ( $f_1=45\text{mm}$ ,  $f_2=150\text{mm}$ ). The  
667 DMD is mounted on a rotation base in order to maximize the output laser power from 'ON'  
668 pixels and minimize the diffraction pattern from DMD pitches. Then the patterned beam  
669 passes through a tube lens ( $f=180\text{mm}$ ) and the objective lens (XLUMPlanFL N, 20x, NA  
670 1.0, Olympus) to generate multiple foci. The objective lens is mounted on a motorized z-  
671 stage (FG-BOBZ-M, Sutter Instrument, U.S.). A custom dichroic mirror  
672 (zt473/589/635rpc-UF2, Chroma, U.S.) is placed before the objective lens to reflect the  
673 stimulation laser beams while transmitting fluorescence photons emitted from the sample.

674 The fluorescence passes through a tube lens ( $f=180\text{mm}$ ) and a 4-f system ( $f_1=100\text{mm}$ ,  
675  $f_2=150\text{mm}$ ), and then is imaged by a camera (Prime95B, Teledyne Photometrix, U.S.,  
676 Figure 4B, Figure 6). Brain samples (acute brain slices and anesthetized mice) are placed  
677 on a motorized x-y stage (X040528 and the controller MP-285, Sutter Instrument, U.S.).  
678 The 3D PSF and patterns (Figure 2 and Figure 2—figure supplement 1) are measured by  
679 capturing the fluorescence excitation in a thin fluorescent film on a microscope slide, with  
680 a sub-stage objective (XLUMPlanFL N, 20x, NA 1.0, Olympus) coupled to a camera  
681 (DCC1545M, Thorlabs, U.S.). Tomographic renderings of the 3D-MAP illumination  
682 patterns are obtained by mechanically scanning the illumination objective along the  
683 optical (z) axis and recording the 2D fluorescence image stacks at linearly spaced depths  
684 with the sub-stage camera. For Figure 3A-D and Figure 4D-E, the targeted positions in  
685 the 3D pattern are stimulated in a random order: two sequential stimulations are  
686 separated by a minimum distance calculated by Poisson disc sampling in order to avoid  
687 photocurrent accumulation caused by repeat stimulations. A NI-DAQ (National  
688 Instruments, NI PCIe-6363) synthesizes custom analog signals to synchronously  
689 modulate the lasers, the galvo-mirrors, the digital triggers to flip frames on the DMD, the  
690 trigger signals to the camera as well as the z-stage. An analog input channel enabling  
691 synchronous measurements of neural photocurrents and spikes in direct response to the  
692 custom 3D light sculpting sequence. A custom MATLAB (MathWorks, U.S.) graphic user  
693 interface is used to control the NI DAQ boards, calibrate and align the photostimulation  
694 and imaging modalities, and for data acquisition and processing.

695



696 **Synchronized control of 3D-MAP.** The key mechanism to generate a focus on the  
697 shifted focal plane by 3D-MAP is to synchronize the scanning mirrors that control the  
698 angle of light ( $\phi_{SM}, \theta$ ) (Figure 7A) and the DMD that controls the amplitude apertures.  
699 Figure 7A shows an example of synthesizing a focus below the native focal plane with 10  
700 beams in 4ms. The color of circular apertures and lines indicates the time stamp of the  
701 DMD apertures and corresponding projection angles. To better show the 3D view in  
702 Figure 7A, we plot the positions of DMD apertures and the projection angles in a 2D view  
703 (Figure 7B-C). The first aperture is located at  $\phi_{DMD} = 0$  (dark blue circle, Figure 7A-B),  
704 and the corresponding projection angle is  $\phi_{SM} = \pi$  (dark blue lines, Figure 7A, C). To  
705 project the angle  $\phi_{SM} = \pi$ , we apply -2V voltage to the x-axis scanning mirror and 0V to  
706 the y-axis scanning mirror (Figure 7C-D). Similarly, we can easily compute the other  
707 projection angles and the aperture positions by evenly dividing  $2\pi$  by the number of  
708 beams. The voltage outputs to control the laser intensity, trigger DMD projection, and  
709 projection angles of the scanning mirrors are shown in Figure 7D. DMD projects the 10  
710 apertures sequentially (Figure 7E) controlled by the TTL trigger signal (purple line, Figure  
711 7D), while the scanning mirrors project the corresponding angles controlled by the  
712 sinusoidal signal (red line, voltage of x-axis scanning mirror; yellow line, voltage of the y-  
713 axis scanning mirror). Strictly, the scanning mirrors voltage should not change during the  
714 projection of one beam. However, because the time is very short (0.3ms in Figure 7D),  
715 the change of projection angle during this time is negligible. Therefore, synchronizing the  
716 DMD and the scanning mirrors is straightforward and only involves calculating the voltage  
717 outputs and the DMD patterns as shown in Figure 7D-E.

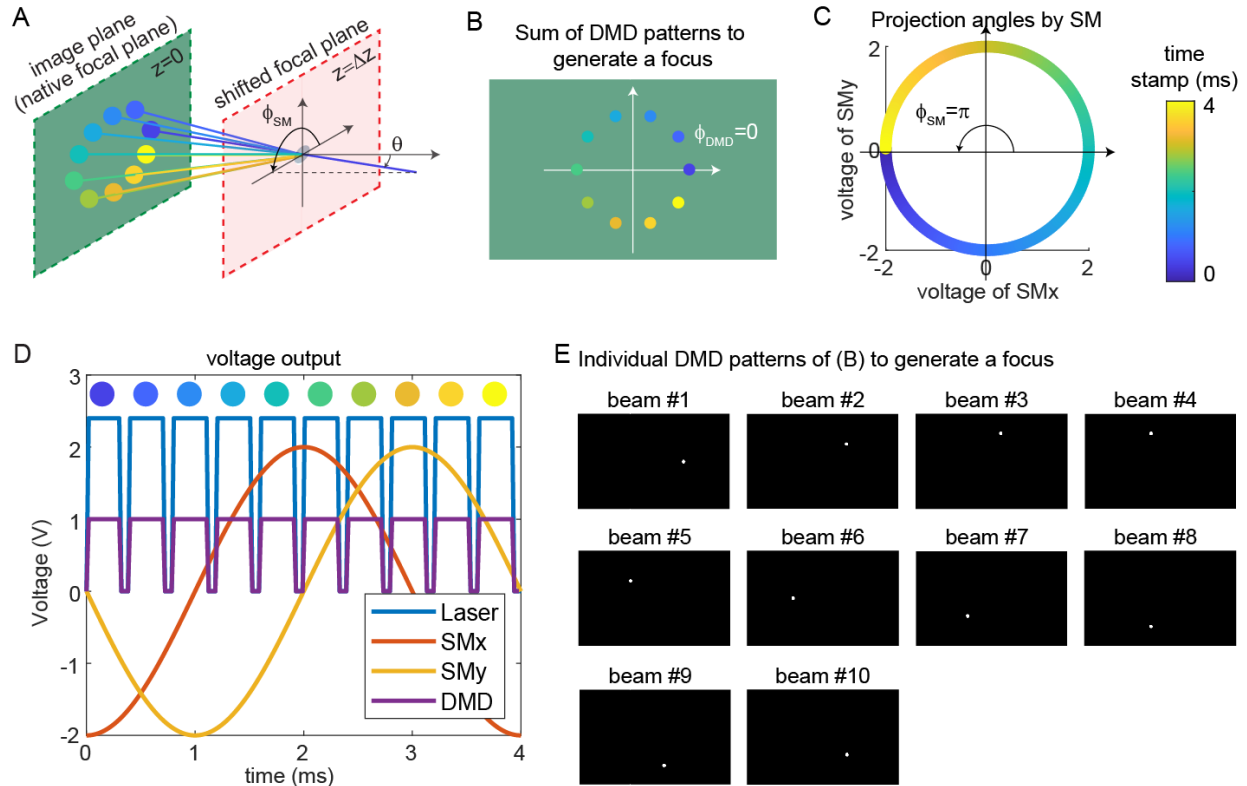

718

719 **Figure 7. Synchronized control of the scanning mirrors and the DMD to generate a focus at a**  
 720 **shifted focal plane by 3D-MAP.** (A) A focus spot is generated by 10 beams in 4ms in total. The DMD  
 721 is located at the relayed image plane projecting 10 apertures sequentially. Scanning mirrors control  
 722 the corresponding projection angles ( $\phi_{SM}, \theta$ ) for each beam.  $\theta$  is the same for all beams and  $\phi_{SM}$   
 723 varies. The color of the apertures and the projection angles shows their respective time stamp. (B) 2D  
 724 view of the image plane in A, showing all 10 apertures on the DMD that are used to generate the focus.  
 725 The first aperture (dark blue circle) is at  $\phi_{DMD} = 0$  and the 10 apertures are evenly distributed in the  
 726 range of  $\phi_{DMD} = (0, 2\pi)$ . (C) Projection angles by scanning mirrors. The first projection angle to  
 727 generate the focus in a with the first aperture in B is located at  $\phi_{SM} = \pi$ . The scanning mirrors evenly  
 728 scan along a circular trace in the 4ms stimulation time. (D) The voltage outputs control the hardware.  
 729 The scanning trace in C is generated by applying sinusoidal signals (red, yellow) to the scanning  
 730 mirrors. The maximum voltage of the sinusoidal signal decides  $\theta$  and the phase of the sinusoidal signal  
 731 decides  $\phi_{SM}$ . The DMD projection is controlled by the TTL signal (purple), which has 10 rising edges  
 732 in the 4ms stimulation time to project 10 patterns sequentially. The laser intensity is controlled by an  
 733 analog signal (blue) that is synchronized with the DMD. (E) The 10 patterns to be projected by the  
 734 DMD to synthesize the focused spot.

735

736 Simulation results for typical misaligned examples and correct examples are shown in

737 Figure 8. When the phase of DMD and the phase of the scanning mirrors are misaligned

738 (Figure 8A), 3D-MAP cannot generate a tight focus at the shifted focal plane. Instead, the

739 shape at the shifted focal plane looks like a ring (a paraboloid in 3D). To correct the phase  
740 mismatch, we can simply adjust  $\phi_{DMD}$  or  $\phi_{SM}$  to change the relative phase between the  
741 DMD patterns and the projection angles and correct for any system misalignment. For  
742 example, we can change  $\phi_{SM}$  from  $\frac{4\pi}{5}$  to  $\pi$ , as a result, the shape at the shifted focal plane  
743 will change from a ring to a spot (Figure 8C). Another misalignment may happen when  
744 the scanning mirrors have asymmetric response (Figure 8B), which generates an elliptical  
745 scanning trace rather than a circular trace. This type of misalignment degrades the focus  
746 of 3D-MAP exactly like optical astigmatism. To correct the asymmetric response of the  
747 scanning mirrors, we can adjust the amplitude of the voltage output to the scanning  
748 mirrors until we obtain a tight focus as in Figure 8C. In addition, adding a  $\pi$ -phase shift to  
749 the DMD patterns or the projection angles can generate a focus below (Figure 8C) or  
750 above (Figure 8D) the native focal plane.

*Misaligned examples*

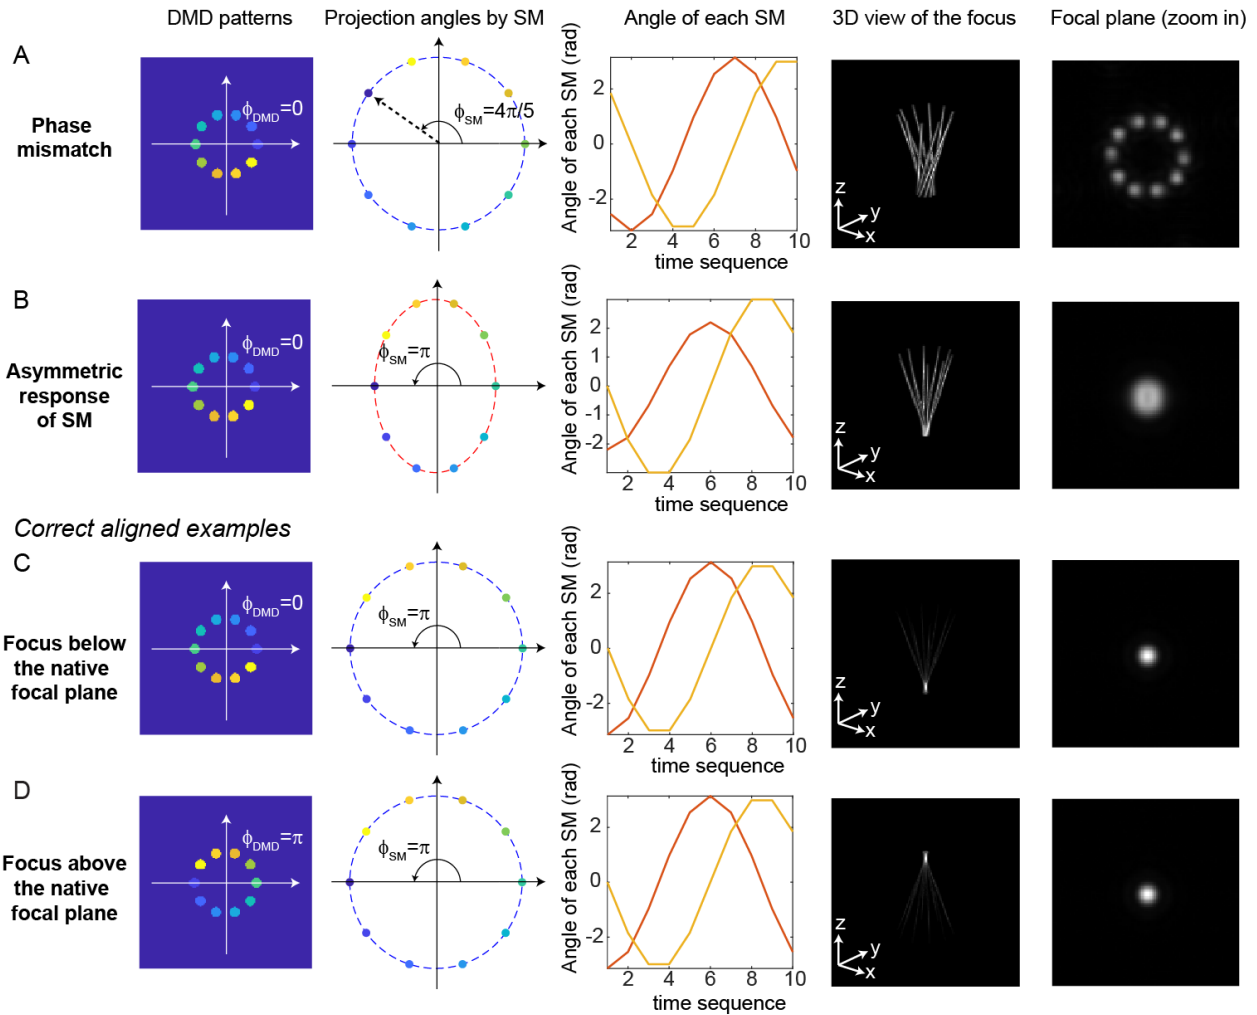

751

752 **Figure 8. Misaligned examples (A, B) and correct aligned examples (C, D) with 3D-MAP.** The  
 753 first column shows the sum of 10 DMD patterns to generate the focus. The second column shows the  
 754 projection angles by the scanning mirrors (SM). The color labels the timestamp of the projection as in  
 755 Figure 7. The third column shows the angle of the scanning mirror in the x-axis (red) and the angle of  
 756 the scanning mirror in the y-axis (yellow) for the sequential 10 projections, respectively. The fourth  
 757 column shows the 3D view of the focus (distorted or tightly focused). The fifth column shows the 2D  
 758 XY-view at the in-focus plane. To show the focus better, the images are zoomed in compared to the  
 759 images in the fourth column. (Aa) Misaligned example of phase mismatching. The 10 beams cannot  
 760 overlap to generate a tight focus, instead, a ring is generated at the shifted focal plane. (B) Misaligned  
 761 example of asymmetric response of the scanning mirrors. The beams in the tangential direction and  
 762 in the sagittal direction overlap at different locations along the z-axis like astigmatism, generating a  
 763 distorted focus. (C) Correct aligned example generates a focus below the native focal plane (same as  
 764 Figure 7). (D) Correct aligned example generates a focus above the native focal plane by adding a  $\pi$ -  
 765 phase shift to the DMD patterns.  
 766

767 **Computational reconstruction framework.** 3D-MAP projects N foci simultaneously in  
768 a 3D volume (V voxels), which is defined as a stimulation pattern ( $i^{\text{th}}$  pattern  $A_i$ ). The  
769 positions of the N foci are randomly selected from the V voxels. The electrophysiology  
770 readout (excitatory postsynaptic currents, EPSCs; or inhibitory postsynaptic currents,  
771 IPSCs) under this pattern is recorded and the maximum absolute value of the EPSCs or  
772 IPSCs is the measurement  $y_i$  under the illumination of  $i^{\text{th}}$  pattern. Thus, the forward  
773 model of multi-site random simultaneous illumination is (Figure 5A):

$$774 \quad y_i = \sum_{j=1}^V A_{i,j} x_j, \quad i = 1, 2, \dots, P.$$

775 P is the number of patterns, and all patterns are orthogonal to each other. To solve the  
776 synaptic connection map at the  $j^{\text{th}}$  voxel ( $x_j$ ), the number P should be equal to V. The  
777 reconstruction framework can be formulated as a  $l_1$ -regularized optimization problem  
778 that seeks to estimate  $x$  by minimizing the difference between the measured currents ( $y$ )  
779 and those expected via the forward model (Figure 5B):

$$780 \quad \underset{x \geq 0}{\operatorname{argmin}} (\|Ax - y\|_2^2 - \lambda R(x)),$$

781 where  $R(x)$  describes total-variation (TV) regularization defined as

$$782 \quad R(x) = \sum_{j=1}^V |x_{j+1} - x_j|.$$

783 This optimization problem is solved using fast iterative shrinkage-thresholding algorithm  
784 (FISTA), which is a first-order gradient descent algorithm. FISTA is able to reconstruct  
785 the result (Figure 5C-D, Figure 5—figure supplement 1) in real time during the  
786 experiments. The algorithm is summarized in Algorithm 1.

787  
788 Algorithm 1. 3D-MAP algorithm

- 
- 789  
790 1. **Procedure** 3D-MAP multi-sites mapping reconstruction  
791 2. Initialize  $x_0$  by uniformly distributed random numbers between [0 1]

```
792     3.  $k \leftarrow 0$ 
793     4. while  $k < \text{maxiter}$  do
794         a. Gradient  $\Delta x \leftarrow \text{FISTA}[x_0, A, y, \lambda]$ 
795         b.  $x_{k+1} = x_k - \mu \Delta x_k$ , where  $\mu$  is the step size
796         c.  $k = k + 1$ 
797     5. return  $x$ 
```

---

798  
799  
800 If every voxel is illuminated M times (the number of repetitions) using P patterns and each  
801 pattern illuminates N voxels, we can draw the relation between these parameters:

$$802 \quad P = MV/N.$$

803 To solve  $x$ , P should be equal to V, that is, the number of repetitions (M) should equal to  
804 the number of foci (N) in each pattern. However, the number of repetitions could be  
805 smaller than M if the multiple illumination foci satisfy these two assumptions: first, the foci  
806 are distributed sparsely in the volume; second, the readout postsynaptic current is a linear  
807 combination of the response from presynaptic neurons stimulated by these foci. As shown  
808 in Fig. S6, where the number of foci is five (N=5), it is possible to reconstruct the synaptic  
809 connection map coarsely with less than five repetitions (M=1-4) with compressive sensing  
810 algorithms.

## 811 812 **Animal preparation and electrophysiology**

813 Neonatal mice age P3-P4 (wild type, *emx1-IRES-Cre* (JAX stock#005628), or *emx1-*  
814 *Cre;GAD67-GFP* (MGI:3590301)) were cryoanesthetized on ice and mounted in a head  
815 mold. AAVs driving Cre-dependent expression of either soma-targeted ChromE (Figure  
816 4), Chrimson (Figure 5), ChRmine (Figure 3—figure supplement 1), or soma-targeted  
817 CoChR (Figure 6 and Figure 6—figure supplement 1-2) were injected via a Nanoject3  
818 (Drummond) into the visual cortex (~1-2 mm lateral to lambda, 3 sites, 22 nL/ site), ~100-  
819 300 microns below the brain surface. In wild type mice we injected AAV-mDlx-ChromE to

820 drive opsin expression in cortical interneurons. All expression vectors co-expressed  
821 nuclear targeted mRuby3 except those in the all-optical interrogation experiments (Figure  
822 6 and Figure 6—figure supplement 1-2). Mice were used for brain slice or *in vivo*  
823 recordings at P28-P56. Brain slices were prepared as previously described<sup>48</sup>. Slices were  
824 transferred to a chamber and perfused with ACSF (no receptor blockers) warmed to ~33  
825 degrees Celsius. First the microscope objective was centered over the area of V1 with  
826 the highest expression density of the opsin, as indicated by the density of mRuby3-  
827 expressing cells. ACSF contained in mM: NaCl 119, KCl 2.5, MgSO<sub>4</sub> 1.3, NaH<sub>2</sub>PO<sub>4</sub> 1.3,  
828 glucose 20, NaHCO<sub>3</sub> 26, CaCl<sub>2</sub> 2.5. Internal solutions contained CsMeSO<sub>4</sub> (for voltage  
829 clamp) or KGluconate (for current clamp) 135 mM and NaCl 8 mM, HEPES 10 mM,  
830 Na<sub>3</sub>GTP 0.3 mM, MgATP 4 mM, EGTA 0.3 mM, QX-314-Cl 5 mM (voltage clamp only),  
831 TEA-Cl 5mM (voltage clamp only). For loose-patch experiments pipettes were filled with  
832 ACSF. The resistance of the patch electrodes ranged from 3-5 megaohms. For direct  
833 recording of photocurrents or light induced spiking, we patched neurons (either in loose  
834 patch or whole cell patch clamp) that expressed mRuby3. For recording light-driven  
835 synaptic inputs we patched from unlabeled putative interneurons (that did not have  
836 pyramidal morphology), or from GFP-expressing neurons in GAD67-GFP mice.

837

838 For optogenetic mapping we generated light spots ~10 microns wide (apertures of 10-20  
839 pixels in radius on DMD). The total stimulation duration was 3-6 milliseconds. For  
840 ChroME-expressing (Figure 3A-E, Figure 4) and CoChR-expressing (Figure 6 and Figure  
841 6—figure supplement 1-2) animals we used 473 nm light, and for Chrimson and ChRmine  
842 we used 635 nm light (Figure 5, Figure 3—figure supplement 1). All mapping used fully

843 randomized sequences. For measurement of PPSFs and multi-spot synaptic maps we  
844 used the system in full 3D mode (Figure 3, Figure 5, Figure 4—figure supplement 1-2).  
845 For single spot synaptic maps all photo-stimuli were at the native focal plane, and the  
846 microscope was moved mechanically under software control to obtain input maps at  
847 different axial planes (Figure 4 and Figure 4—figure supplement 1). Mapping at the native  
848 focal plane requires only one DMD mask per light stimulus as compared to ten for a full  
849 3D pattern, allowing for many more masks to be stored in the DMD RAM and rapidly  
850 displayed. Scanning mirrors scan continuously in  $2\pi$  to enable z-section when mapping  
851 at the native focal plane, which is different from direct 2D projection. At the beginning of  
852 each mapping experiment, we first took a ten-point laser-power dose response curve of  
853 the photocurrent or light-induced synaptic current and used this data to choose the power  
854 range for photocurrent or synaptic mapping. For spiking PPSFs, the lowest light level that  
855 reliably generated spikes when directly targeting the soma was used. For single spot  
856 mapping we updated the DMD pattern at 40-80 Hz. For multi-spot mapping we updated  
857 the DMD pattern at 10-20 Hz, which minimized network adaptation.

858

859 For *in vivo* electrophysiology recording and all-optical interrogation, mice were sedated  
860 with chlorprothixene (0.075 mg) and anesthetized with isoflurane (1.5-2%). A small  
861 stainless steel plate was attached to the skull with Metabond. The skull was protected  
862 with cyanoacrylate glue and dental cement (Orthojet). A 2.5 mm craniotomy was made  
863 over V1 with a circular biopsy punch. The dura was removed with fine forceps and the  
864 craniotomy was covered with 1.2% agarose in ACSF and additional ACSF  
865 (electrophysiology) or covered with a cranial window (all-optical interrogation). The mouse



866 was then injected with urethane for prolonged anesthesia (0.04 g), and supplemented  
867 with 0.5-1.5% isoflurane at the recording rig. Body temperature was maintained at 35-37  
868 degrees Celsius with a warming blanket. Neurons were recorded under visualization  
869 either with epifluorescence (to target opsin expressing neurons in the upper 100 microns  
870 of the brain for PPSF measurements) or in L2/3 via oblique infrared contrast imaging via  
871 an optic fiber (200 $\mu$ m diameter) placed at a ~25 degree angle from horizontal located as  
872 close as possible to the brain surface underneath the objective. The same procedure for  
873 optogenetic mapping used *in vitro* was used *in vivo*. All data analysis was performed in  
874 MATLAB.

875

876 **Acknowledgements:** This work was supported by DARPA N66001-17-C-40154 to H.A.  
877 and L.W., as well as NIH UF1NS107574 to H.A. and L.W. This work was supported by  
878 the New York Stem Cell Foundation. H.A. is a New York Stem Cell Foundation Robertson  
879 Investigator. Y. X. is a Weill Neurohub Fellow. This work was funded by the Gordon and  
880 Betty Moore Foundation's Data-Driven Discovery Initiative through Grant GBMF4562 to  
881 L.W, and by the Burroughs Wellcome Fund, Career Award at the Scientific Interface  
882 (5113244) to N.P..

883

#### 884 **Author contributions**

885 All authors contributed to the development of 3D-MAP. N.P. developed the pilot version  
886 of electrophysiology-only 3D-MAP and the algorithm of 3D image synthesis. Y.X.  
887 designed and assembled the current experimental setup, performed all the experiments,  
888 developed the optimization reconstruction algorithm, and performed data processing in

889 all sections. H.A. designed and performed electrophysiology experiments in mouse brain  
890 slice and in anesthetized mouse and advised the research. Y.X. and H.A. wrote the  
891 manuscript with additional input from N.P and L.W.. L.W. helped advise Y.X. and N.P.

892

## 893 **References**

894

- 895 1. Deisseroth, K. Optogenetics. *Nat. Methods* **8**, 26–29 (2011).
- 896 2. Zhang, F. *et al.* Multimodal fast optical interrogation of neural circuitry. *Nature* **446**, 633–  
897 639 (2007).
- 898 3. Ronzitti, E. *et al.* Recent advances in patterned photostimulation for optogenetics. *J. Opt.*  
899 *19*, 113001 (2017)
- 900 4. Lutz, C. *et al.* Holographic photolysis of caged neurotransmitters. *Nat. Methods* **5**, 821–  
901 827 (2008)
- 902 5. Anselmi, F., Ventalon, C., Bègue, A., Ogden, D. & Emiliani, V. Three-dimensional imaging  
903 and photostimulation by remote-focusing and holographic light patterning. *Proc. Natl.*  
904 *Acad. Sci. U. S. A.* **108**, 19504–19509 (2011).
- 905 6. Szabo, V., Ventalon, C., De Sars, V., Bradley, J. & Emiliani, V. Spatially selective  
906 holographic photoactivation and functional fluorescence imaging in freely behaving mice  
907 with a fiberscope. *Neuron* **84**, 1157–1169 (2014).
- 908 7. Reutsky-Gefen, I. *et al.* Holographic optogenetic stimulation of patterned neuronal activity  
909 for vision restoration. *Nat. Commun.* **4**, 1509 (2013)
- 910 8. Dhawale, A. K., Hagiwara, A., Bhalla, U. S., Murthy, V. N. & Albeanu, D. F. Non-redundant  
911 odor coding by sister mitral cells revealed by light addressable glomeruli in the mouse.  
912 *Nat. Neurosci.* **13**, 1404–1412 (2010)
- 913 9. Leifer, A. M., Fang-Yen, C., Gershow, M., Alkema, M. J. & Samuel, A. D. T. Optogenetic  
914 manipulation of neural activity in freely moving *Caenorhabditis elegans*. *Nat. Methods* **8**,  
915 147–152 (2011)
- 916 10. Adam, Y. *et al.* Voltage imaging and optogenetics reveal behaviour-dependent changes  
917 in hippocampal dynamics. *Nature* **569**, 413–417 (2019).
- 918 11. Werley, C. A., Chien, M.-P. & Cohen, A. E. Ultrawidefield microscope for high-speed  
919 fluorescence imaging and targeted optogenetic stimulation. *Biomed. Opt. Express* **8**,  
920 5794–5813 (2017)
- 921 12. Sakai, S., Ueno, K., Ishizuka, T. & Yawo, H. Parallel and patterned optogenetic  
922 manipulation of neurons in the brain slice using a DMD-based projector. *Neurosci. Res.*  
923 **75**, 59–64 (2013).
- 924 13. Carrillo-Reid, L., Han, S., Yang, W., Akrouh, A. & Yuste, R. Controlling Visually Guided  
925 Behavior by Holographic Recalling of Cortical Ensembles. *Cell* **178**, 447–457.e5 (2019).
- 926 14. Naka, A. *et al.* Complementary networks of cortical somatostatin interneurons enforce  
927 layer specific control. *Elife* **8**, (2019).
- 928 15. Daie, K., Svoboda, K. & Druckmann, S. Targeted photostimulation uncovers circuit motifs  
929 supporting short-term memory. *Nat. Neurosci.* **24**, 259–265 (2021)

- 930 16. Sridharan, S. *et al.* High performance microbial opsins for spatially and temporally precise  
931 perturbations of large neuronal networks. *bioRxiv* 2021.04.01.438134 (2021)  
932 doi:10.1101/2021.04.01.438134
- 933 17. Nikolenko, V. *et al.* SLM Microscopy: Scanless Two-Photon Imaging and Photostimulation  
934 with Spatial Light Modulators. *Front. Neural Circuits* **2**, 5 (2008).
- 935 18. Papagiakoumou, E. *et al.* Scanless two-photon excitation of channelrhodopsin-2. *Nat.*  
936 *Methods* **7**, 848–854 (2010).
- 937 19. Pégard, N. C. *et al.* Three-dimensional scanless holographic optogenetics with temporal  
938 focusing (3D-SHOT). *Nat. Commun.* **8**, 1228 (2017).
- 939 20. Gill, J. V. *et al.* Precise Holographic Manipulation of Olfactory Circuits Reveals Coding  
940 Features Determining Perceptual Detection. *Neuron* **108**, 382–393.e5 (2020)
- 941 21. Marshel, J. H. *et al.* Cortical layer-specific critical dynamics triggering perception. *Science*  
942 **365**, (2019)
- 943 22. Robinson, N. T. M. *et al.* Targeted Activation of Hippocampal Place Cells Drives Memory-  
944 Guided Spatial Behavior. *Cell* **183**, 1586–1599.e10 (2020)
- 945 23. Forli, A., Pisoni, M., Printz, Y., Yizhar, O. & Fellin, T. Optogenetic strategies for high-  
946 efficiency all-optical interrogation using blue light-sensitive opsins. *Elife* **10**, (2021)
- 947 24. Mardinly, A. R. *et al.* Precise multimodal optical control of neural ensemble activity. *Nat.*  
948 *Neurosci.* **21**, 881–893 (2018).
- 949 25. Podgorski, K. & Ranganathan, G. Brain heating induced by near-infrared lasers during  
950 multiphoton microscopy. *J. Neurophysiol.* **116**, 1012–1023 (2016)
- 951 26. Sun, S., Zhang, G., Cheng, Z., Gan, W. & Cui, M. Large-scale femtosecond holography  
952 for near simultaneous optogenetic neural modulation. *Opt. Express* **27**, 32228–32234  
953 (2019).
- 954 27. Yang, S. J. *et al.* Extended field-of-view and increased-signal 3D holographic illumination  
955 with time-division multiplexing. *Opt. Express* **23**, 32573–32581 (2015)
- 956 28. Petreanu, L., Mao, T., Sternson, S. M. & Svoboda, K. The subcellular organization of  
957 neocortical excitatory connections. *Nature* **457**, 1142–1145 (2009)
- 958 29. Losavio, B. E., Iyer, V., Patel, S. & Saggau, P. Acousto-optic laser scanning for multi-site  
959 photo-stimulation of single neurons in vitro. *J. Neural Eng.* **7**, 045002 (2010)
- 960 30. Wang, K. *et al.* Precise spatiotemporal control of optogenetic activation using an acousto-  
961 optic device. *PLoS One* **6**, e28468 (2011)
- 962 31. Zhang, J., Pégard, N., Zhong, J., Adesnik, H. & Waller, L. 3D computer-generated  
963 holography by non-convex optimization. *Optica, OPTICA* **4**, 1306–1313 (2017).
- 964 32. GERCHBERG & W, R. A practical algorithm for the determination of phase from image  
965 and diffraction plane pictures. *Optik* **35**, 237–246 (1972)
- 966 33. Leseberg, D. Computer-generated three-dimensional image holograms. *Appl. Opt.* **31**,  
967 223–229 (1992)
- 968 34. Xue, Y. *et al.* Scanless volumetric imaging by selective access multifocal multiphoton  
969 microscopy. *Optica* vol. **6** 76 (2019).
- 970 35. Hossein Eybposh, M., Caira, N. W., Atisa, M., Chakravarthula, P. & Pégard, N. C.  
971 DeepCGH: 3D computer-generated holography using deep learning. *Opt. Express* **28**,  
972 26636–26650 (2020)

- 973 36. Li, N., Daie, K., Svoboda, K. & Druckmann, S. Robust neuronal dynamics in premotor  
974 cortex during motor planning. *Nature* 532, 459–464 (2016)
- 975 37. Adesnik, H. & Scanziani, M. Lateral competition for cortical space by layer-specific  
976 horizontal circuits. *Nature* 464, 1155–1160 (2010)
- 977 38. Packer, A. M., Russell, L. E., Dalgleish, H. W. P. & Häusser, M. Simultaneous all-optical  
978 manipulation and recording of neural circuit activity with cellular resolution in vivo. *Nat.*  
979 *Methods* 12, 140–146 (2015)
- 980 39. Yang, W., Carrillo-Reid, L., Bando, Y., Peterka, D. S. & Yuste, R. Simultaneous two-  
981 photon imaging and two-photon optogenetics of cortical circuits in three dimensions. *Elife*  
982 7, (2018)
- 983 40. Levoy, M., Zhang, Z. & McDowall, I. Recording and controlling the 4D light field in a  
984 microscope using microlens arrays. *J. Microsc.* 235, 144–162 (2009)
- 985 41. Prevedel, R. *et al.* Simultaneous whole-animal 3D imaging of neuronal activity using light-  
986 field microscopy. *Nat. Methods* 11, 727–730 (2014)
- 987 42. Pégard, N. C. *et al.* Compressive light-field microscopy for 3D neural activity recording.  
988 *Optica, OPTICA* 3, 517–524 (2016)
- 989 43. Botcherby, E. J., Juškaitis, R., Booth, M. J. & Wilson, T. An optical technique for remote  
990 focusing in microscopy. *Opt. Commun.* 281, 880–887 (2008)
- 991 44. Dalgleish, H. W. *et al.* How many neurons are sufficient for perception of cortical activity?  
992 *Elife* 9, (2020)
- 993 45. Dombeck, D. A., Harvey, C. D., Tian, L., Looger, L. L. & Tank, D. W. Functional imaging  
994 of hippocampal place cells at cellular resolution during virtual navigation. *Nat. Neurosci.*  
995 13, 1433–1440 (2010)
- 996 46. Marshel, J. H., Kaye, A. P., Nauhaus, I. & Callaway, E. M. Anterior-posterior direction  
997 opponency in the superficial mouse lateral geniculate nucleus. *Neuron* 76, 713–720 (2012)
- 998 47. Stamatakis, A. M. *et al.* Simultaneous Optogenetics and Cellular Resolution Calcium  
999 Imaging During Active Behavior Using a Miniaturized Microscope. *Front. Neurosci.* 12,  
1000 496 (2018)
- 1001 48. Pluta, S. *et al.* A direct translaminar inhibitory circuit tunes cortical output. *Nat. Neurosci.*  
1002 18, 1631–1640 (2015).
- 1003

1004 **Supplementary materials**

1005

1006 **Table 1. Comparison of light-targeting photostimulation methods**

| Specific technique | Two-photon optogenetics                                                                                                                                                                                                                                                                                  | One-photon optogenetics                                                                                                                                         |                                                                                                                                                                                                          |                                                                                                                                                                                                                              |                                                                                                                                                                                                                          |
|--------------------|----------------------------------------------------------------------------------------------------------------------------------------------------------------------------------------------------------------------------------------------------------------------------------------------------------|-----------------------------------------------------------------------------------------------------------------------------------------------------------------|----------------------------------------------------------------------------------------------------------------------------------------------------------------------------------------------------------|------------------------------------------------------------------------------------------------------------------------------------------------------------------------------------------------------------------------------|--------------------------------------------------------------------------------------------------------------------------------------------------------------------------------------------------------------------------|
|                    |                                                                                                                                                                                                                                                                                                          | Scanning methods (GM & AOD)*                                                                                                                                    | DMD§ projection                                                                                                                                                                                          | CGH**                                                                                                                                                                                                                        | Our technique 3D-MAP                                                                                                                                                                                                     |
| Pros               | <ul style="list-style-type: none"> <li>• High 3D resolution</li> <li>• High penetration depth</li> <li>• Less cross-talk because of non-linear excitation</li> </ul>                                                                                                                                     | <ul style="list-style-type: none"> <li>• Low power illumination</li> <li>• Compact and inexpensive systems</li> </ul>                                           |                                                                                                                                                                                                          |                                                                                                                                                                                                                              |                                                                                                                                                                                                                          |
|                    |                                                                                                                                                                                                                                                                                                          | <ul style="list-style-type: none"> <li>• Reduced cross-talk with sparse excitation</li> </ul>                                                                   | <ul style="list-style-type: none"> <li>• Fast patterning speed</li> <li>• Large field-of-view</li> </ul>                                                                                                 | <ul style="list-style-type: none"> <li>• High 3D resolution</li> </ul>                                                                                                                                                       | <ul style="list-style-type: none"> <li>• Large number of DoF</li> <li>• Fast patterning speed</li> <li>• High 3D resolution</li> <li>• Large field-of-view</li> <li>• Less cross-talk from out-of-focus light</li> </ul> |
| Cons               | <ul style="list-style-type: none"> <li>• Small numbers of targets</li> <li>• Small accessible volume</li> <li>• Small numbers of degrees of freedom</li> <li>• High power illumination (heat and photodamage)</li> <li>• Expensive and sophisticated systems</li> <li>• Slow patterning speed</li> </ul> | <ul style="list-style-type: none"> <li>• Rayleigh scattering limits penetration depth</li> <li>• Lower axial resolution than two-photon optogenetics</li> </ul> |                                                                                                                                                                                                          |                                                                                                                                                                                                                              |                                                                                                                                                                                                                          |
|                    |                                                                                                                                                                                                                                                                                                          | <ul style="list-style-type: none"> <li>• No Simultaneous multiple stimulation</li> <li>• Small number of DoF†</li> </ul>                                        | <ul style="list-style-type: none"> <li>• Low resolution</li> <li>• No depth specificity</li> <li>• 2D modulation</li> <li>• Small number of DoF</li> <li>• Cross-talk from out-of-focus light</li> </ul> | <ul style="list-style-type: none"> <li>• Small number of targets</li> <li>• Small accessible volume</li> <li>• Small number of DoF</li> <li>• Slow patterning speed</li> <li>• Cross-talk from out-of-focus light</li> </ul> | <ul style="list-style-type: none"> <li>• Lossy amplitude modulation that requires bright laser sources.</li> </ul>                                                                                                       |
| Refs               | [13-19]                                                                                                                                                                                                                                                                                                  | [22-24]                                                                                                                                                         | [8-12]                                                                                                                                                                                                   | [4-7]                                                                                                                                                                                                                        | This study                                                                                                                                                                                                               |

1007

1008 \* GM: Galvo Mirrors. AOD: Acousto-Optic Deflectors.

1009 † DoF: Degrees of Freedom.

1010 § DMD: Digital Micromirror Device

1011 \*\* CGH: Computer Generated Holography.

1012

1013 **Table 2. Comparison of the cost of one-photon 3D-MAP and two-photon 3D-SHOT<sup>19,24</sup>**

| Description                          | 1P 3D-MAP              |          |                  | 2P 3D-SHOT                              |           |                  |
|--------------------------------------|------------------------|----------|------------------|-----------------------------------------|-----------|------------------|
|                                      | Part #                 | Budget   | High performance | Part #                                  | Budget    | High performance |
| Photo-stimulation and imaging lasers | Blue DPSS laser        | \$700    | \$9,000          | Femtosecond laser for photo-stimulation | \$80,000  | \$160,000        |
|                                      | Yellow DPSS laser      | \$3,500  | \$13,000         | Femtosecond laser for calcium imaging   | \$80,000  | \$140,000        |
| Imaging sensor/system                | sCMOS camera           | \$5,000  | \$25,000         | PMTs and acquisition systems            | \$20,000  | \$40,000         |
| Light modulator                      | DMD and the controller | \$2,000  | \$15,000         | LCoS-SLM                                | \$15,000  | \$60,000         |
|                                      | Scanning mirrors       | \$2,500  | \$6,400          |                                         |           |                  |
| Optical table                        | min 3'x3'              | \$4,000  | \$7,500          | min 4'x6'                               | \$8,500   | \$10,000         |
| Total                                |                        | \$17,700 | \$75,900         |                                         | \$203,500 | \$410,000        |

1014  
1015

1016

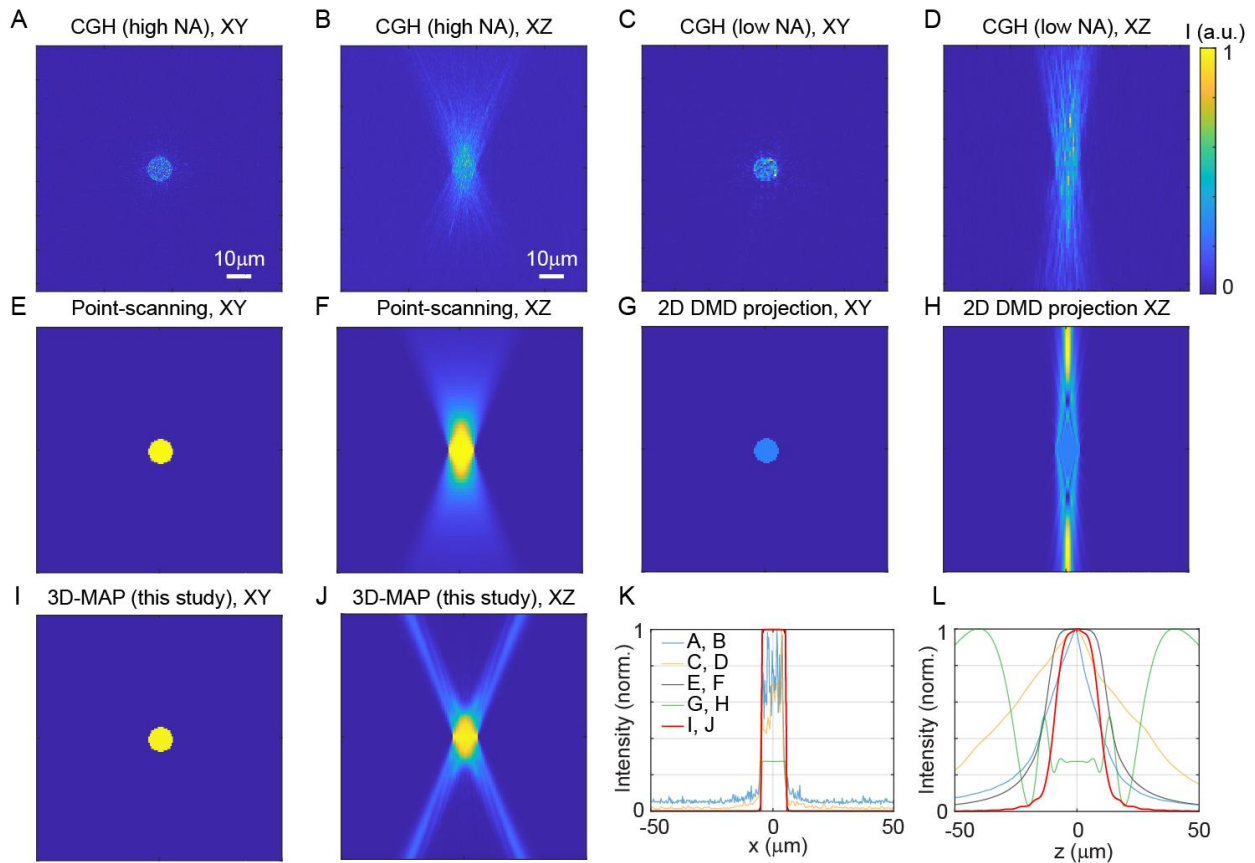

1017

1018

**Figure 1—figure supplement 1. Comparison of 3D spatial resolution of 3D-MAP**

1019

**versus existing photostimulation approaches.** All simulations aim to generate a

1020

10 $\mu$ m-diameter spot in-focus to match the size of a neuron in order to maximize

1021

photostimulation efficiency. The light fields are calculated with 635nm red light illumination

1022

and 20x, NA = 1.0 objective lens. The pixel size of the DMD is 7.5 $\mu$ m. The number of

1023

pixels of the SLM for CGH is 1152x1152 pixels. (A, B) The lateral cross-section (A) and

1024

axial cross-section (B) of CGH at NA = 1.0 (overflow the back aperture). The FOV under

1025

high NA illumination is 319x319 $\mu$ m<sup>2</sup>, which is much smaller than the FOV of 3D-MAP. (C,

1026

D) The lateral cross-section (C) and axial cross-section (D) of CGH at effective NA = 0.55

1027

(under-fill the back aperture) to match the FOV of 3D-MAP (800x800 $\mu$ m<sup>2</sup>). (E, F) The

1028

lateral cross-section (E) and axial cross-section (F) of spiral scan with a single focus. The



1029 total intensity is an incoherent sum of the intensity of each scanning point. (G, H) The  
1030 lateral cross-section (G) and axial cross-section (H) of 2D DMD projection. (I, J) The  
1031 lateral cross-section (I) and axial cross-section (J) of 3D-MAP (10 overlapping beams).  
1032 (K, L) A comparison of intensity profile of all these methods along the x-axis (K) and z-  
1033 axis (L). 3D-MAP achieves the highest 3D spatial resolution among all the methods.  
1034 Figure (A-J) are in the same size of  $100 \times 100 \mu\text{m}^2$ . Scale bar,  $10 \mu\text{m}$ .  
1035

1036

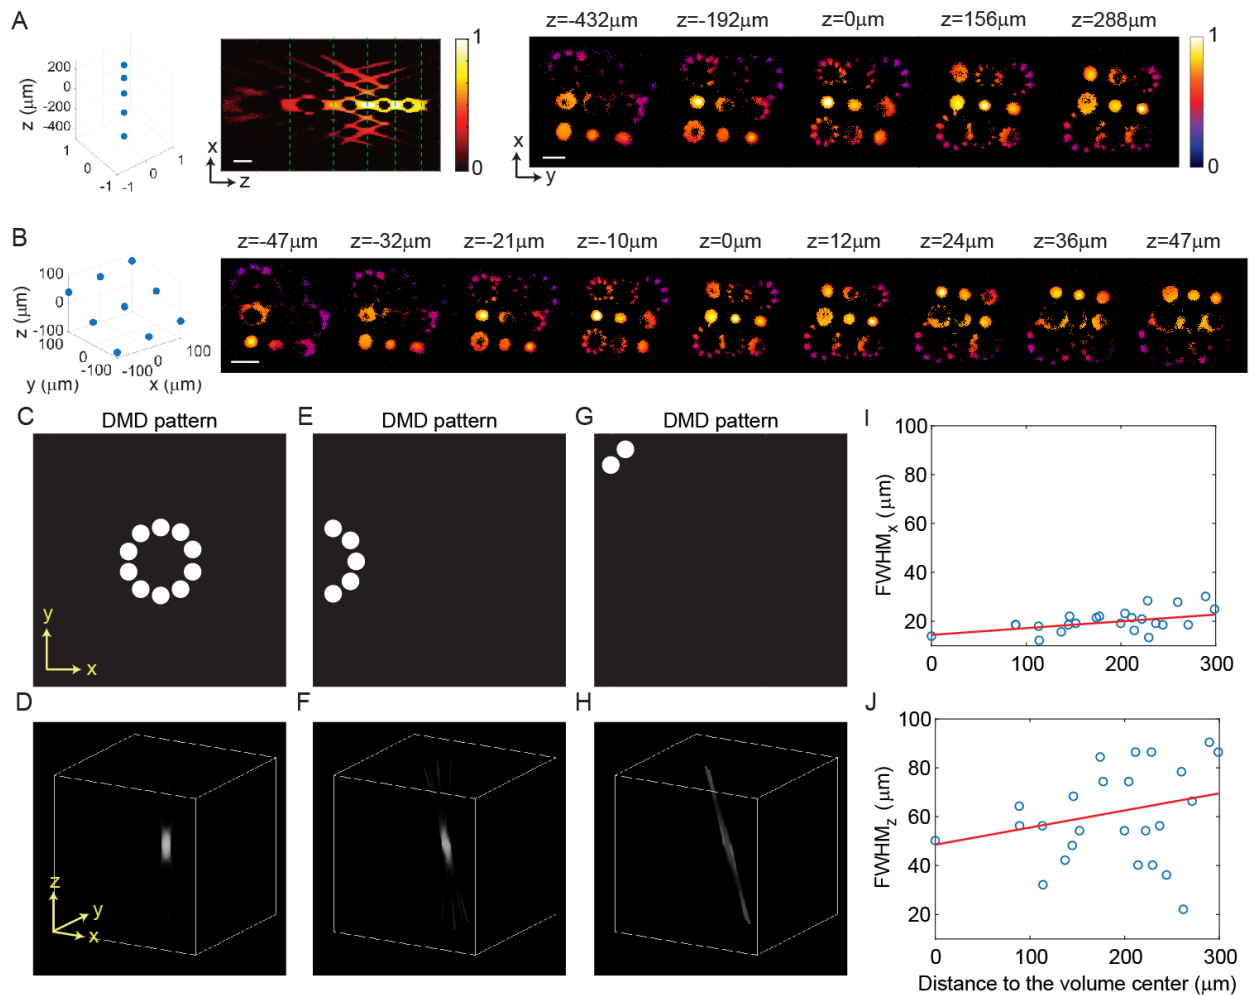

1037

1038

1039 **Figure 2—figure supplement 1. 3D-MAP is able to simultaneously generate multiple**

1040 **foci anywhere in 3D.** (A) Five foci are located right on top of each other along the z-axis.

1041 Left: XZ cross-section. Right: XY cross-section corresponding to the z depths marked

1042 with green dash lines. (B) Nine foci with evenly distributed depths form a tilted plane

1043 across the 3D volume. For both (A) and (B), the target location is indicated in the 3D

1044 diagram on the left, and the corresponding experimental 3D fluorescence measurements

1045 are on the right. The foci are recorded in 3D by capturing a stack of 2D fluorescence

1046 images at various depths of the 3D illumination pattern intercepting a thin, uniform,

1047 fluorescent calibration slide with a sub-stage objective coupled to a camera. Scale bar,

1048 100 $\mu$ m. (C-H) Simulation results show spatial resolution degrades near the edge of the  
1049 field-of-view. (C) The DMD pattern to generate a focus in the center of the field-of-view.  
1050 (D) A focus generated by the 10 beams in c in the center of the accessible volume. (E)  
1051 The DMD pattern to generate a focus on the edge of the field-of-view. (F) The focus  
1052 generated by the 5 beams in e, which is distorted like a coma aberration. (G) The DMD  
1053 pattern to generate a focus in the corner of the field-of-view. (H) The focus generated by  
1054 the 2 beams in g, which is severely distorted and barely has any z-sectioning ability. (I-J)  
1055 The (I) lateral and (J) axial resolution of the 25 foci showing in Figure 2D versus their  
1056 distance to the center of the volume. The blue circles mark the FWHM of the foci, and the  
1057 red line is a linear fitting result. On average, the FWHM of the foci 300 $\mu$ m away from the  
1058 center is worse than the one in the center, with (I) 63% worse along the x-axis and (J) 38%  
1059 worse along the z-axis.  
1060

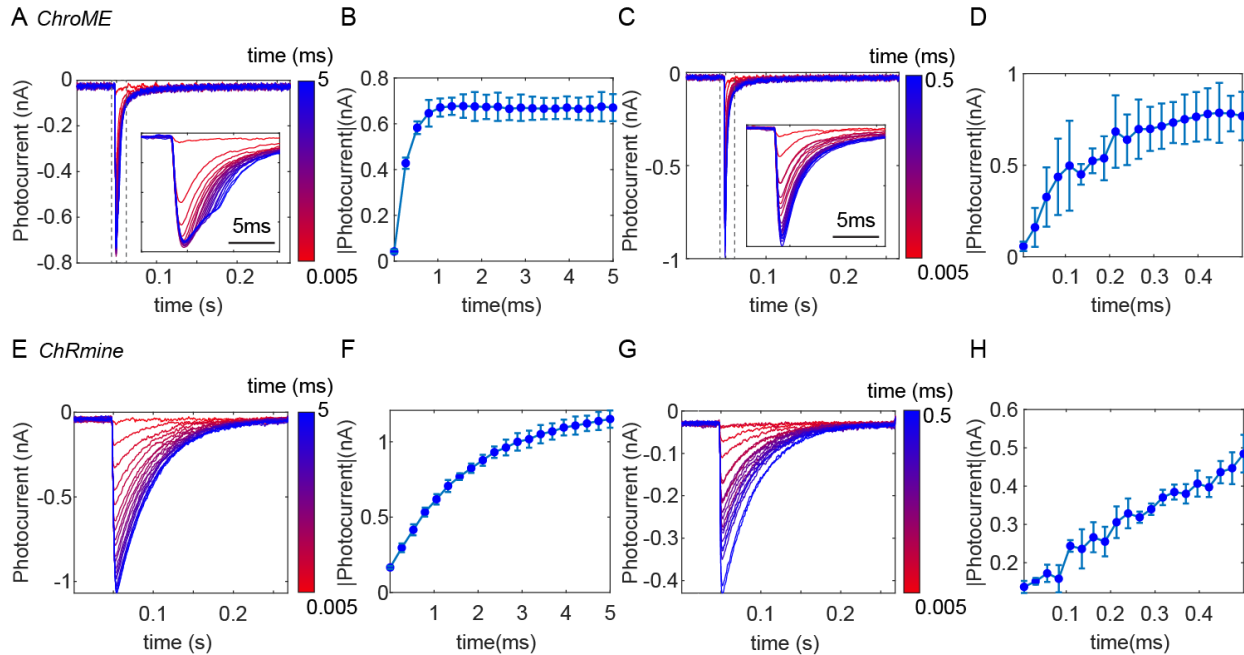

1061  
1062  
1063

**Figure 3—figure supplement 1. Temporal response of (A-D) ChroME and (E-H)**

1064 **ChRmine, expressed in CHO cells. (A, E) Photocurrent measured under various**  
1065 **stimulation times (i.e. dwell time) ranging from 5μs to 5ms. We used an acousto-optic**  
1066 **deflector (AOD) as a fast shutter to control the stimulation time. Insert plot: the zoom-in**  
1067 **view of the photocurrent from 0.045s to 0.06s (dash box). (B, F) The maximum**  
1068 **photocurrent at each stimulation time. (C, G) Photocurrent measured at various short**  
1069 **stimulation times ranging from 5μs to 500μs. Insert plot: the zoom-in view of the**  
1070 **photocurrent from 0.045s to 0.06s (dash box). (D, H) The maximum photocurrent at each**  
1071 **short stimulation time. The result shows the photocurrent of opsins linearly increases with**  
1072 **the increase of stimulation time, and gradually saturates at longer stimulation time. The**  
1073 **saturation stimulation time is about 0.2ms for ChroME and about 2ms for ChRmine.**  
1074 **ChroME also has a faster response than ChRmine. Therefore, over kHz patterning speed**  
1075 **like what 3D-MAP achieves could reduce the stimulation time so that it becomes possible**  
1076 **to photo-stimulate much more sites in the same experimental time.**

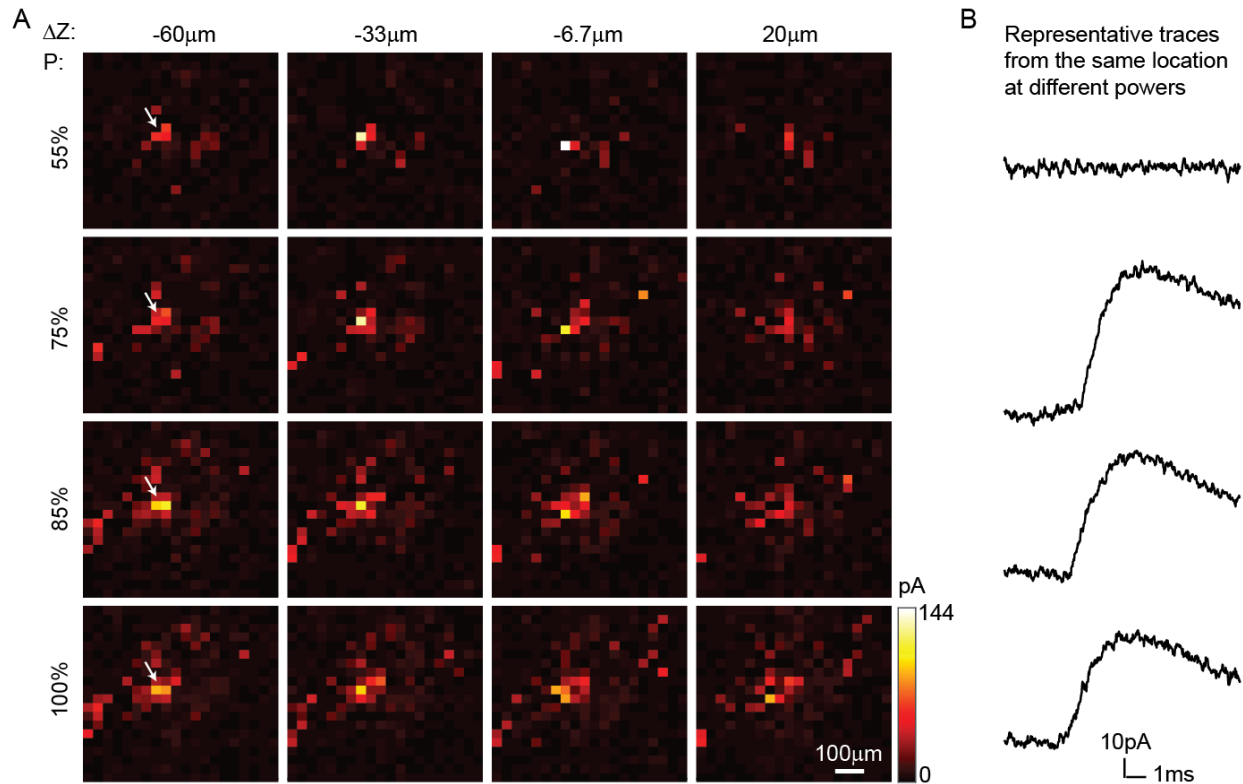

1077  
1078

1079 **Figure 4—figure supplement 1. 3D-MAP provides mapping of inhibitory synaptic**

1080 **connections *in vivo*.** We patched a pyramidal neuron without opsin at [0, 0, 0] and photo-

1081 stimulated the volume around it pixel-by-pixel, and the parvalbumin neurons connect to

1082 this patched cell via synapses expressed opsin. The current readout reveals the inhibitory

1083 synaptic connections from all parvalbumin neurons to this pyramidal neuron. The

1084 mapping process is repeated 4 times. (A) Each row of the images is measured under the

1085 same stimulation laser power (100% power is 419µW), and each column of the images

1086 is at the same axial plane. Scale bar: 100µm. (B) Representative traces of postsynaptic

1087 currents under each stimulation power (measured from the pixel pointed by white arrow).

1088 These traces elucidate the synaptic connection is binary: once the neuron is photo-

1089 stimulated, the synaptic current remains the same, even if the stimulation power is

1090 increased. The unique photosensitivity of each neuron helps us to identify different neural  
1091 ensembles by changing the stimulation power.

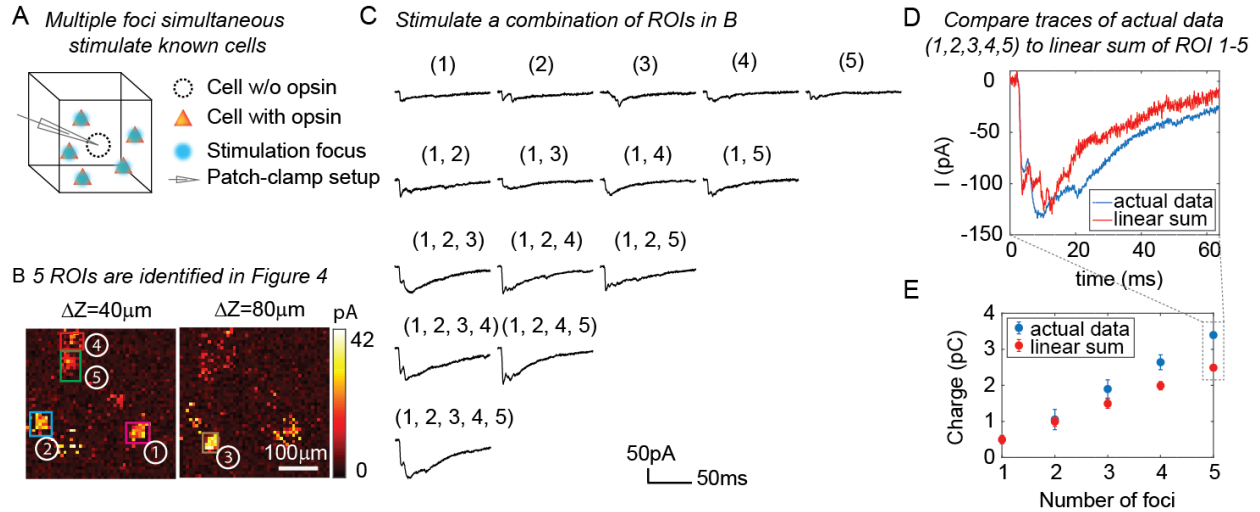

1092

1093

1094 **Figure 4—figure supplement 2. 3D-MAP is able to stimulate multiple targets**

1095 **simultaneously to explore network dynamics.** (A) Schematic diagram of the

1096 experiment. The stimulation ROIs are known to have synaptic connections with the

1097 patched interneuron from the widefield mapping as described in Figure 4. (B) The

1098 positions of the 5 ROIs are identified in Figure 4E. (C) Representative photocurrent traces

1099 for simultaneous stimulation of subsets of the 5 ROIs. Traces are averaged over 4

1100 repetitions. The number(s) above each trace indicate the ROIs that were stimulated to

1101 generate the response. (D) Comparison of the actual synaptic response by simultaneous

1102 stimulation of ROI 1-5 (blue) to the response calculated by linearly summing the traces

1103 when stimulating ROI 1-5 individually (red). The individual response from each ROI is

1104 shown in the first row of C. (E) Comparison of the integral of the synaptic currents from

1105 simultaneous stimulation of multiple connected presynaptic neurons (blue) to the linear

1106 sum of the individual stimulation responses (red). The mean and standard deviation of

1107 data is calculated from all the k-combinations (number of foci) from the given set of 5

1108 targets. The sample size is  $C(5, k)$ ,  $k = 1, 2, 3, 4, 5$ .



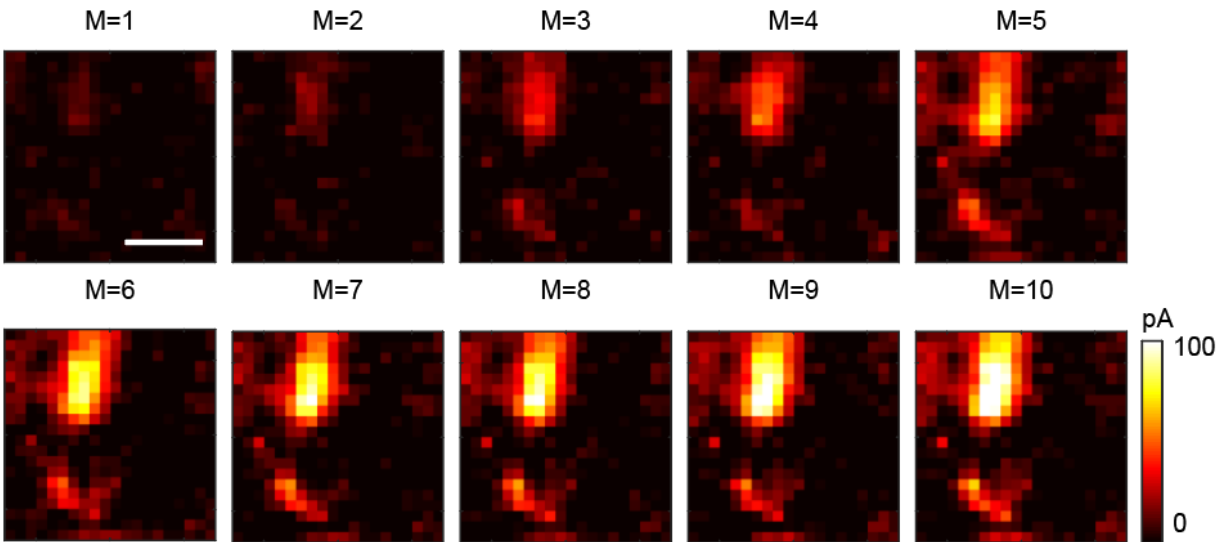

1109  
1110 **Figure 5—figure supplement 1. Multi-site random simultaneous stimulation by 3D-**  
1111 **MAP can reconstruct synaptic connectivity maps with fewer measurements than**  
1112 **single-target stimulation.** M: number of repeat measurements (see Computational  
1113 reconstruction framework in Methods). The data is recorded from five simultaneously  
1114 stimulated foci. The optimization problem is underdetermined for values of  $M < 5$ .  
1115 Assuming the five foci stimulate sites which are sparsely distributed in space, it is possible  
1116 to reconstruct the synaptic connectivity map with fewer measurements ( $M=1-4$ ) using  
1117 compressive sensing. Scale bar, 100 $\mu\text{m}$ .

1118

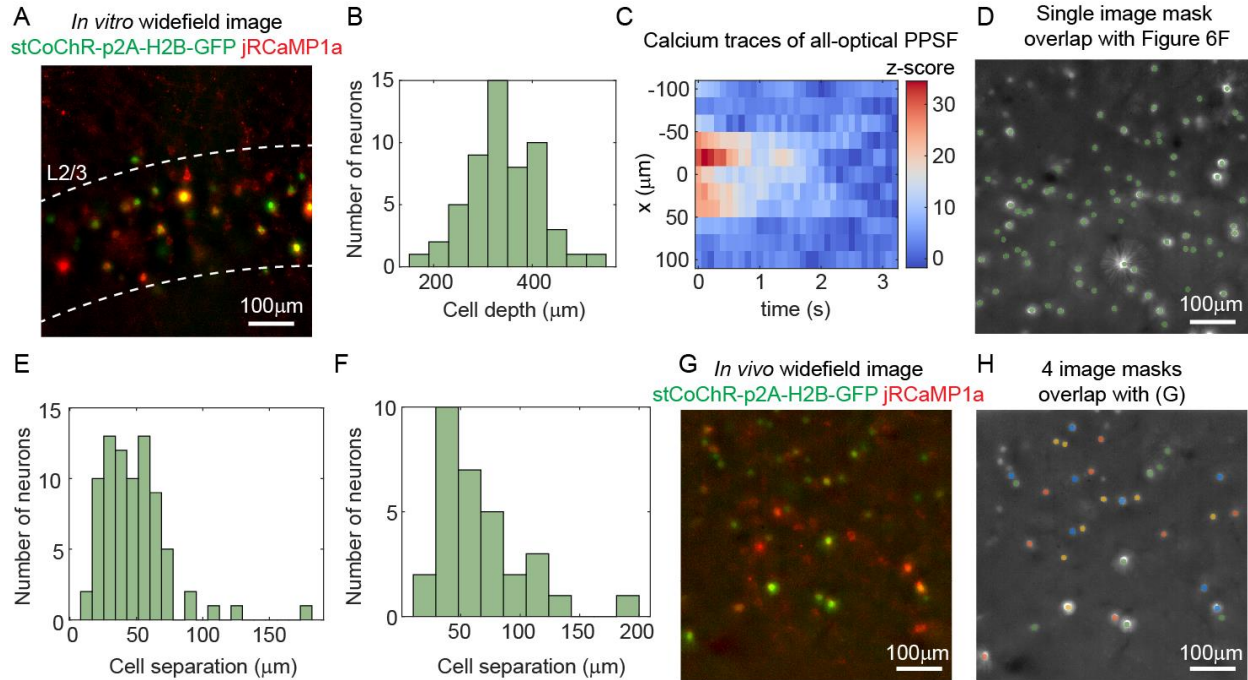

1119

1120 **Figure 6—figure supplement 1. All-optical interrogation of neurons with 3D-MAP.**

1121 (A) Maximum z projection of the brain slice used in the control experiment (Figure 6B-C).

1122 (B) Histogram of the depth of 55 neurons relative to the surface of the mouse brain. The

1123 expression is in L2/3. (C) An example of calcium traces at 11 lateral locations (y-axis) in

1124 the experiment of *in vivo* all-optical PPSF measurement. The traces are averaged across

1125 10 repetitions of a represented neuron at  $x=0$ . (D) The image mask on the DMD for the

1126 80 neurons in the volume shown in Figure 6F. Green, the image mask generated by

1127 image segmentation. Gray scale image, maximum z projection of the widefield image

1128 stack of the somata. (E) Histogram of neuron separation in D. The mean separation of

1129 the 80 neurons is  $49 \pm 26 \mu\text{m}$ . (F) Histogram of neuron separation in G-H. The mean

1130 separation of the 32 neurons is  $67 \pm 37 \mu\text{m}$ . (G) Maximum z projection of the *in vivo*

1131 widefield image stack of the neurons in Figure 6H-I. (H) The 4 different image masks for

1132 ensemble stimulation in Figure 6H-I. Neurons labeled by the same color are photo-

1133 stimulated simultaneously. The masks are generated by Poisson disc sampling.

1134

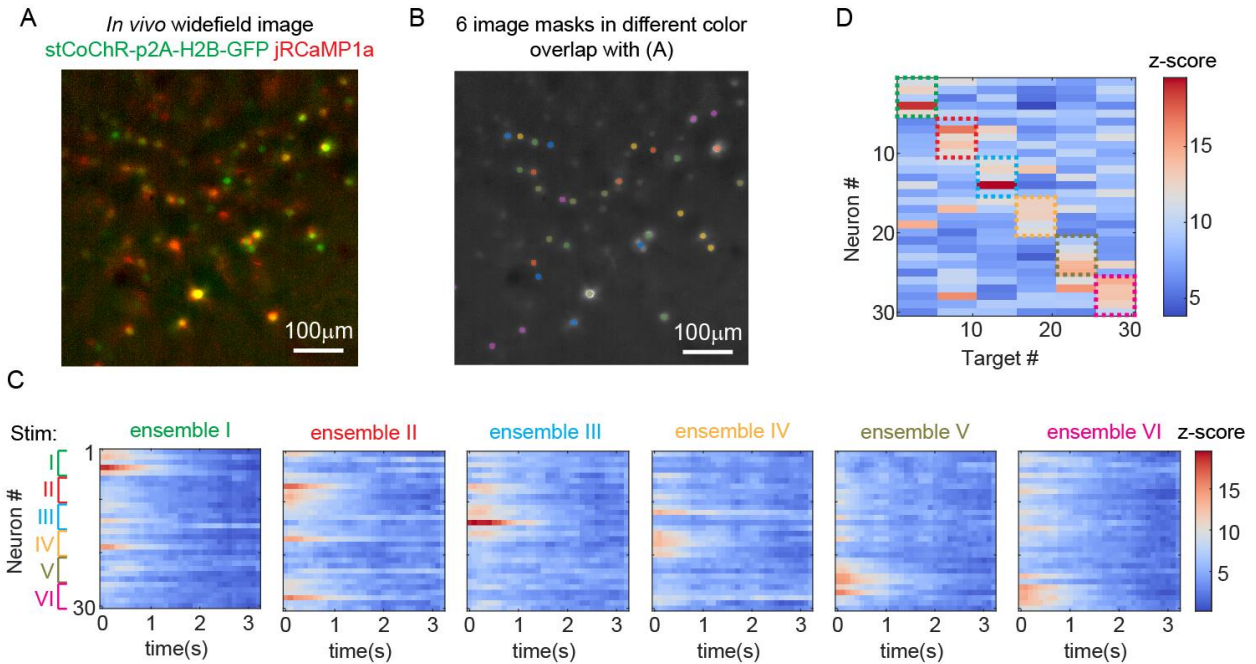

1135

1136 **Figure 6—figure supplement 2. Another example of stimulating ensembles while**

1137 **imaging all the neurons *in vivo*.** (A) Maximum z projection of the *in vivo* widefield image

1138 stack of the neurons. (B) 6 distinct patterns for ensemble stimulation and imaging. (C)

1139 Calcium activity of 30 neurons that are addressed with the 6 patterns in B. (D) Peak z-

1140 score of each calcium trace recorded in c versus the corresponding stimulation patterns.

1141 The dashed colored rectangles highlight the neurons that are stimulated in each of the 6

1142 patterns.

1143

1144
